1       **Human immunodeficiency virus type 2 capsid protein mutagenesis**  
2                   **defines the determinants for Gag-Gag interactions**

3  
4       Huixin Yang<sup>1,4</sup>, Nathaniel Talledge<sup>1,2,3</sup>, William E. Arndt<sup>1,2,5</sup>, Wei Zhang<sup>1,2,6\*</sup> and Louis M.  
5       Mansky<sup>1,2,3,4,5,6\*</sup>

6  
7       <sup>1</sup> Institute for Molecular Virology, University of Minnesota – Twin Cities, Minneapolis, MN 55455  
8       USA

9       <sup>2</sup> Division of Basic Sciences, School of Dentistry, University of Minnesota – Twin Cities,  
10       Minneapolis, MN 55455 USA

11       <sup>3</sup> Masonic Cancer Center, University of Minnesota – Twin Cities, Minneapolis, MN 55455 USA

12       <sup>4</sup> Comparative Molecular Biosciences Graduate Program, University of Minnesota – Twin Cities,  
13       St. Paul, MN 55108, USA.

14       <sup>5</sup> Biochemistry, Molecular Biology & Biophysics Graduate Program, University of Minnesota –  
15       Twin Cities, Minneapolis, MN 55455 USA

16       <sup>6</sup> Characterization Facility, College of Sciences and Engineering, University of Minnesota – Twin  
17       Cities, Minneapolis, MN 55455 USA

18  
19       \* Corresponding authors: [mansky@umn.edu](mailto:mansky@umn.edu), [zhangwei@umn.edu](mailto:zhangwei@umn.edu)

20

21 **Abstract**

22 Human immunodeficiency virus (HIV) Gag drives particle assembly. The capsid (CA) domain is  
23 critical for Gag oligomerization, and encodes key residues that dictate Gag-Gag interactions and  
24 particle morphology. The immature particle morphology of HIV-2 is intriguingly different relative to  
25 that of HIV-1. To help define the critical determinants for Gag-Gag interactions and investigate  
26 the differences between HIV-1 and HIV-2, we have conducted mutagenesis in targeted  
27 locations of HIV-2 CA that have been implicated in Gag-Gag interactions. In particular, a panel  
28 of 31 site-directed mutants at the HIV-2 CA inter-hexamer interface, intra-hexamer interface and  
29 CA inter-domain linker have been created and analyzed for the efficiency of particle production,  
30 particle morphology, particle infectivity, Gag subcellular distribution and *in vitro* protein assembly.  
31 Seven conserved residues (L19A, A41, I152, K153, K157, N194, D196) and two non-conserved  
32 residues (G38, N127) were found that impact Gag multimerization and particle assembly. Taken  
33 together, these observations complement structural analyses of immature HIV-2 particle  
34 morphology and Gag lattice organization, and provide insights into the morphological  
35 differences between HIV-1 and HIV-2 immature particles and their impact on virus replication.

36

## 37 Introduction

38 Human immunodeficiency virus (HIV) belongs to the genus *Lentivirus*, the family  
39 *Retroviridae*. To date, HIV has infected more than 70 million people worldwide [1]. HIV has two  
40 main types, HIV-1 and HIV-2, which have similarities in life cycles, transmission modes, and  
41 clinical consequences [2]. Despite these similarities there are differences in the prevalence,  
42 transmission rate, and infectivity of these two viruses. Compared to HIV-1, HIV-2 is less  
43 widespread and less infective [2, 3]. HIV-2 also has lower viral loads during the course of the  
44 infection, slower rates of CD4 decline, and delayed clinical progression [4]. HIV-2 patients are  
45 considered less infectious in the early stages of infection and long-term nonprogressors [5, 6].  
46 The different steps of the HIV life cycle are targeted by combined antiretroviral therapy (ART)  
47 drugs, leading to a remarkable reduction in overall morbidity and mortality [10, 11].

48 The HIV assembly pathway is an underdeveloped target for the discovery and advancement  
49 of antiretroviral drugs, so our studies focused on this step. Although much effort has been  
50 undertaken to target the assembly of HIV particles [7-11], none of these efforts to date have  
51 resulted in an approved anti-HIV drug. HIV capsid (CA) is a promising antiviral drug target,  
52 because its stability and integrity are critical to the normal life cycle and infectivity of the virus  
53 [12]. For instance, Lenacapavir (LEN, GS-6207, GS-CA2), a long-acting HIV-1 CA inhibitor,  
54 currently in phase 2/3 clinical trials, sought FDA approval [13]. LEN binds to the hydrophobic  
55 pocket formed by two adjoining CA subunits within the hexamer. Meanwhile, HIV-2 has been  
56 shown to be resistant to effective anti HIV-1 drugs [14, 15]. Therefore, it is critical to investigate  
57 the molecular difference between HIV-1 and HIV-2 to develop effective treatments for both virus  
58 types.

59 HIV Gag protein is the essential structural protein responsible for orchestrating the majority  
60 of steps in HIV assembly [11]. HIV Gag has a low level (59% identity, 72% similarity) of amino  
61 acid sequence conservation between HIV-1 (NL4-3) and HIV-2 (ROD) strains. Most assembly  
62 steps are performed by three Gag subdomains. Matrix (MA) is responsible for Gag-membrane  
63 binding [16, 17]. Nucleocapsid (NC) interacts with the viral RNA packaging signal and  
64 encapsidates the viral genome [18]. CA is critical for Gag oligomerization during virus assembly  
65 and core formation during virus maturation and is divided into two structurally distinct domains,  
66 CA<sub>NTD</sub> and CA<sub>CTD</sub> [19], which are connected by a flexible inter-domain linker. The major  
67 homology region (MHR), a 20-residue segment (residues HIV-1 CA 153-172) toward the N-  
68 terminus of CA<sub>CTD</sub>, is highly conserved. During particle assembly, Gag polyproteins (Pr55<sup>Gag</sup>)  
69 initially accumulate at the plasma membrane forming a radially arranged lattice that curves and  
70 deforms the membrane [16]. The accumulated Gag drives budding and release forming an

71 immature virus particles. Then, HIV protease (PR) cleaves the Gag polyprotein into each of the  
72 respective domains to form a mature particle [20]. In the center of the particle, CA reassembles  
73 into a cone-shaped core which contains a dimeric viral genomic RNA associated with NC [16].

74 The morphologies of HIV-1 immature and mature particles have been well studied [21, 22].  
75 Previous studies showed that the overall mature HIV-1 particle is made from a lattice of ~250  
76 CA hexamers closed by the insertion of 12 CA pentamers [23]. However, there is no pentamers  
77 in the immature HIV-1 Gag lattice since the pentamers mediate areas of high curvature of the  
78 mature conical core that is not present in the immature lattice. The CA hexamer contains an  
79 inner ring of six CA NTDs held together by contacts between adjacent CA molecules [24, 25].  
80 The interactions between CA monomers are related by 6-fold symmetry within a hexamer (intra-  
81 hexamer) and by 3-fold and 2-fold symmetry between neighboring hexamers (inter-hexamer).  
82 The hexamers are stabilized by interactions at these interfaces [23].

83 To date, surprising and intriguing differences have been discovered between the immature  
84 Gag lattice structure of HIV-1 and other retroviruses, although HIV-1 and HIV-2 CA have a  
85 moderate level of amino acid sequence conservation (69% identity, 80% similarity, **Fig. 1A**).  
86 Moreover, many immature Gag lattice structures have been published, such as Rous sarcoma  
87 virus (RSV) [26], Murine leukemia virus (MLV) [27], and HIV-1 [28]. Given previous observations  
88 that specific amino acid residues in Gag CA encode the key determinants that dictate virus  
89 particle morphology, we hypothesized that the differences between HIV-1 and HIV-2 Gag CA  
90 lead to differences in viral assembly and ultimately infectivity. We also investigated what HIV-2  
91 CA-CA interactions were critical for virus particle assembly and explained why the critical  
92 residues are responsible for various HIV-2 phenotypes.

93 Critical amino acid residues in CA dictate virus particle morphology. Mutagenesis studies  
94 confirmed the importance of interface residues for core morphology and stability and virion  
95 infectivity [23, 24, 29, 30]. Mutations in the CA have been shown to affect particle assembly and  
96 virion infectivity in different retroviruses, such as HIV-1 [31], Simian immunodeficiency virus  
97 (SIVmac) [32], Mason-Pfizer monkey virus (M-PMV) [33], and RSV [34]. Several key mutants,  
98 such as HIV-1 CA W184A and M185A caused Gag assembly defects, produced non-infectious  
99 viruses, reduced CA dimerization and intermolecular Gag–Gag interactions *in vitro*, diminished  
100 immature particle production *in vivo*, and abolished CA dimerization [29, 35]. Moreover, parallel  
101 studies have been done on SIVmac constructs [32]. However, there have been no studies  
102 focused on HIV-2 critical amino acids. We hypothesized that the mutants at HIV-2 Gag CA inter-  
103 and intra-hexameric interfaces result in inefficient particle assembly.

104 A previous study investigating HIV-1 and SIVmac residues swaps examined the mutant  
105 effects on particle infectivity and production [36]. Select mutations in HIV-1 CA Helix 7, such as  
106 E128N, I141C, were found less infectivity and reduced more than 50% particle production when  
107 swapped to the corresponding SIVmac residue [36]. This indicated that some non-conserved  
108 amino acids in HIV-1 CA Helix 7 showed important functions.

109 To investigate the differences between HIV-1 and HIV-2, a panel of 10 site-directed mutants  
110 in non-conserved HIV-2 CA residues based on sequence alignment with HIV-1 (**Fig. 1A**) was  
111 also conducted by mutating HIV-2 CA residues to HIV-1 types to analyze the efficiency of  
112 immature particle production and Gag subcellular distribution. None of the ten mutants were  
113 previously tested in HIV-2 studies, and eight mutants (except N127E and C140I) were not  
114 examined in either HIV types. Of the conserved residue swaps none of the HIV-2 CA mutations  
115 were previously reported, and four mutations (L19A, I152A, K153A, N194A) were unique to both  
116 HIV-1 and HIV-2. Selected mutants were additionally analyzed for mature particle production,  
117 infectivity, Gag subcellular distribution and *in vitro* protein assembly. HIV-2 critical residues and  
118 novel CA-CA interactions were discovered.

119 These efforts provided the mechanistic detail of CA residues that mediate viral particle  
120 assembly, and highlight fundamental differences between HIV-1 and HIV-2 CA. Our studies also  
121 provided further insight into the fundamental aspects of HIV particle assembly that will inform  
122 efforts to discover new antiretroviral drug targets for HIV therapies.

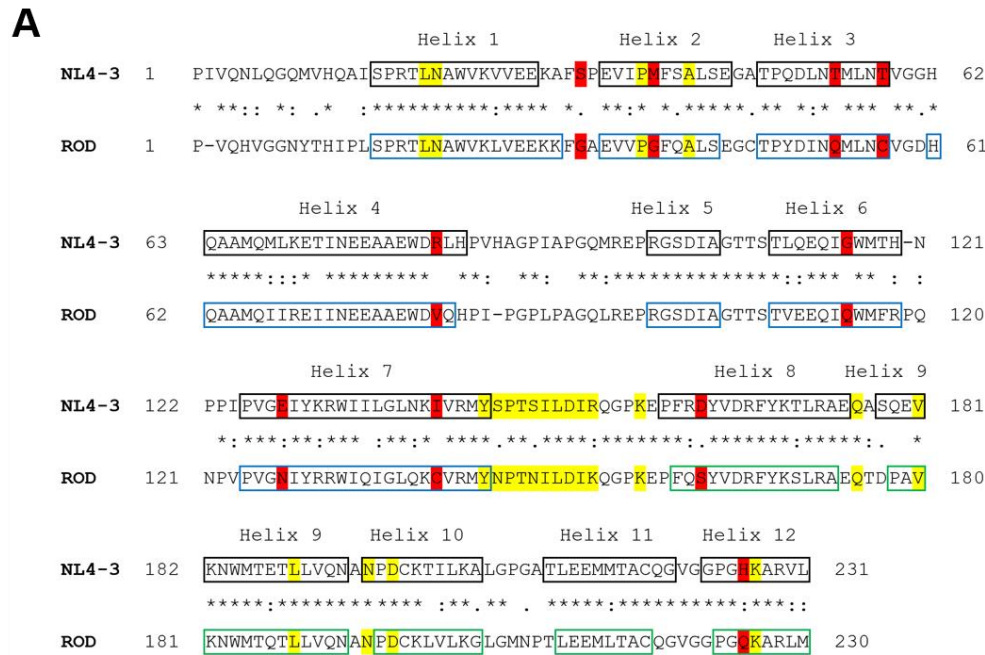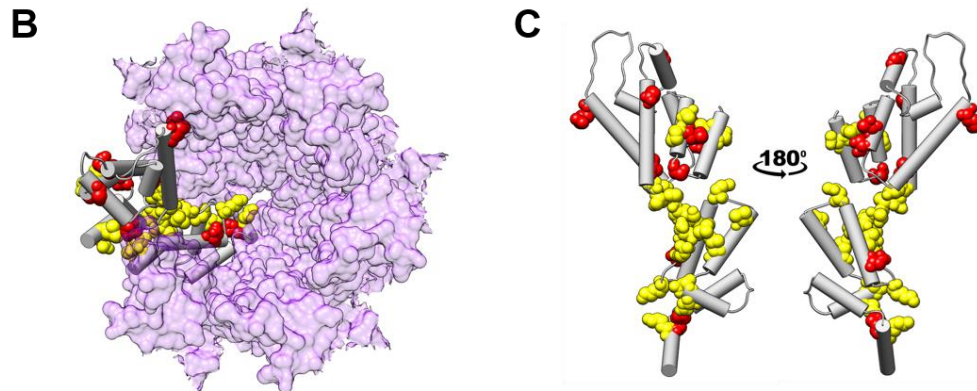

123

124 **Fig 1A. Alignment of HIV-1 and HIV-2 CA sequences.** Amino acid sequences in CA of HIV-1 NL4-3 (GenBank  
 125 accession no. AF324493; CA 1-231; Gag 133-363) and HIV-2 ROD (GenBank accession no. M15390; CA 1- 230;  
 126 Gag 136-365) were aligned by Clustal Omega Multiple Sequence Alignment [1]. Locations of HIV-1 immature CA  
 127 helices in this alignment are as described previously [2] (PDB ID: 5L93) and indicates by black boxes. HIV-2  
 128 immature CA<sub>NTD</sub> (CA aa, 1-144; Gag aa, 136-279) helices are as described previously [3] (PDB ID: 2WLV), and  
 129 indicates with blue boxes. CA<sub>CTD</sub> (CA aa,145-230; Gag aa, 280-365) helices are predicted by the PSIPRED server [4,  
 130 5], indicates by green boxes. “\*” indicates conserved amino acids; “:” indicates amino acid substitution with high  
 131 amino acid similarity; “.” indicates amino acid substitutions with low similarity. Yellow highlight indicates alanine-  
 132 scanning mutagenesis on conserved residues. Red highlight indicates mutagenesis on non-conserved residues,  
 133 which HIV-2 residues were mutated to HIV-1 types. **(B) Structure of CA hexamer.** Mutagenesis of conserved  
 134 residues were colored yellow, and mutagenesis of non-conserved residues were colored red. **(C) Structure of CA**  
 135 **monomer.**

136

## 137 Results

### 138 Mutations to conserved CA residues decrease immature particle production

139 Given previous observations that specific amino acid residues in Gag CA encode the key  
140 determinants that dictated virus particle morphology, CA-CA interactions for a multitude of  
141 retroviruses such as HIV-1, MLV, and RSV [26-28, 37, 38]. However, there were few mutants of  
142 HIV-2 Gag CA residues have been demonstrated to inhibit particle assembly. To identify critical  
143 residues in HIV-2 Gag CA that mediate HIV particle assembly with detailed molecular analysis  
144 we conducted an exhaustive search of comparative analysis between previous studies in HIV-1  
145 and HIV-2 [29, 35, 39]. First, we conducted alanine-scanning mutagenesis in targeted locations  
146 of the CA protein that have been implicated in encoding critical amino acid residues important  
147 for CA-CA interactions that impact virus particle assembly and release from cells. In particular, a  
148 panel of twenty-one mutants was created and analyzed for the efficiency of particle production  
149 through immunoblot detection and quantification of Gag protein products in an HIV-2 tractable  
150 virus-like particle (VLP) model system validated to mimic authentic immature virus particle  
151 assembly and release closely (**Fig. 2**).

152 We conducted ten site-directed mutants at the HIV-2 CA<sub>NTD</sub>-CA<sub>CTD</sub> linker domain (**Fig. 2A**).  
153 Two mutations I152A and K153A were discovered to reduce immature particle production  
154 significantly, 3.9-fold, and 4-fold relative to WT levels, respectively as assessed by p24 levels in  
155 immunoblots of viral supernatants (**Fig. 2A**). These two mutants are in the MHR region. The  
156 previous publication has reported that some conserved HIV-1 MHR residue substitution (i.e.,  
157 HIV-1 Q155N) leads to a dramatic reduction in immature particle production in human and  
158 nonhuman primate cells expressing HIV-1 proviruses [40]. Moreover, I152A was a novel mutant  
159 that the parallel mutant (HIV-1 I153A) had not been generated in HIV-1.

160 Five site-directed mutants were conducted at the intra-hexamer interface, four of them  
161 (L19A, K157A, N194A, and D196A) produced at least 2-fold less immature particles than HIV-2  
162 WT (**Fig. 2B**). L19A and N194A were novel mutants that have not been tested in HIV-1 CA,  
163 produced 3.5-fold and 4.5-fold less immature particles than WT, respectively. K157A and  
164 D196A, which produced 2.1-fold and 2.8-fold less immature particles, respectively, were  
165 reported reduced particle production in HIV-1 CA [29, 35, 41].

166 Four site-directed mutants at the 2-fold inter-hexamer interface and two mutants at 3-fold  
167 inter-hexamer interface were selected to analyze relative immature particle production (**Fig. 2C**).  
168 All 2-fold inter-hexamer interface showed similar immature particle production to HIV-2 WT  
169 except N20A which had a modest decrease in production (~92% of WT). One of two mutants at



170 3-fold inter-hexamer interface, A41D, significantly reduced immature particle production by 4.6-  
171 fold (**Fig. 2C**).  
172

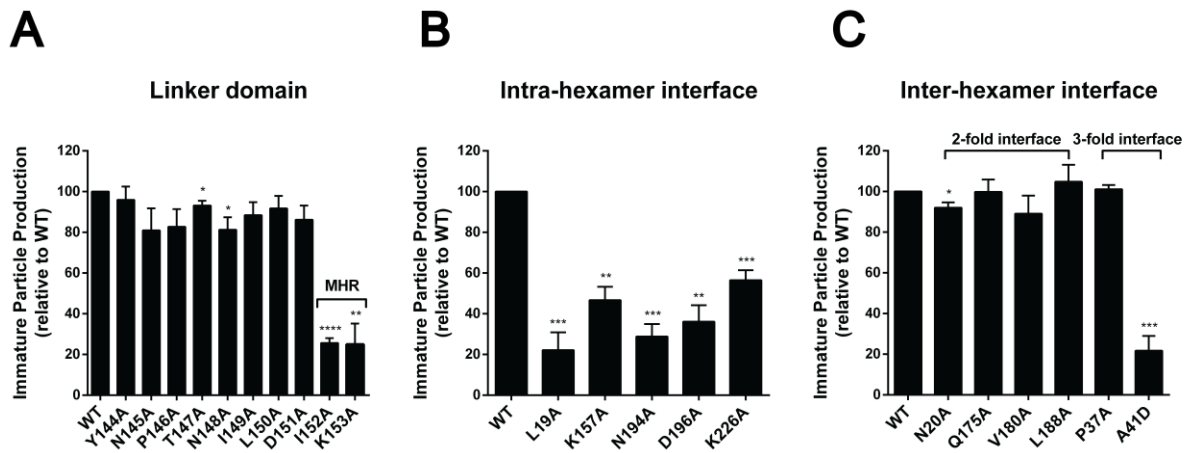

173  
174 **Fig 2. Relative immature particle production of HIV-2 CA mutants at CA<sub>NTD</sub>-CA<sub>CTD</sub> linker (A), intra-hexamer**  
175 **interface (B), and inter-hexamer interface (C).** 293T/17 cells were transfected with untagged HIV-2 Gag expression  
176 constructs (WT or alanine-scanning mutants), and the cell culture supernatants were harvested 48h post transfection.  
177 Immunoblot analysis was conducted to determine the amount of immature particle production for WT and CA  
178 conserved mutants. The relative particle production of CA mutants was calculated relative to WT. Histograms are  
179 presented to indicate the relative immature particle production of HIV-2 CA alanine-scanning mutants. Error bars  
180 represent standard error of the mean from three independent experiments. Significance relative to WT was  
181 determined by unpaired t test. \*\*\*\*,  $P < 0.0001$ ; \*\*\*,  $P < 0.001$ ; \*\*,  $P < 0.01$ ; \*,  $P < 0.05$ . MHR = Major homology  
182 region.  
183

#### 184 Mutations to non-conserved CA residues decrease immature particle production

185 Preliminary data has discovered striking morphological differences between immature HIV-1  
186 and HIV-2 particles that argue in support of a model in which relatively minor changes in the  
187 geometry of protein-protein interactions can profoundly impact overall particle morphology [3].  
188 To investigate the differences between HIV-1 and HIV-2 CA, a panel of 10 site-directed mutants  
189 in non-conserved HIV-2 CA residues was conducted by mutating HIV-2 CA residues to the HIV-  
190 1 residue equivalent from the CA sequence alignment (**Fig. 1 and Fig. 3**). Two mutants HIV-2  
191 CA mutants (G38M and N127E) were discovered to produce less than 50% of WT immature  
192 particles. Both of these residues are located at the 3-fold inter-hexamer interface in the CA<sub>NTD</sub>  
193 based on structural comparisons to HIV-1 lattice structures.

194 HIV-2 G38M showed reductions in immature and mature particle production, which are 2.7-  
195 fold (**Fig. 3A**) and 2-fold less than WT (**Fig. 4C**), respectively. HIV-1 M39G mutant was also  
196 generated to test mature HIV-1 particle production, resulting in 2.6-fold less particle production  
197 than WT (**Fig. 4A**).  
198



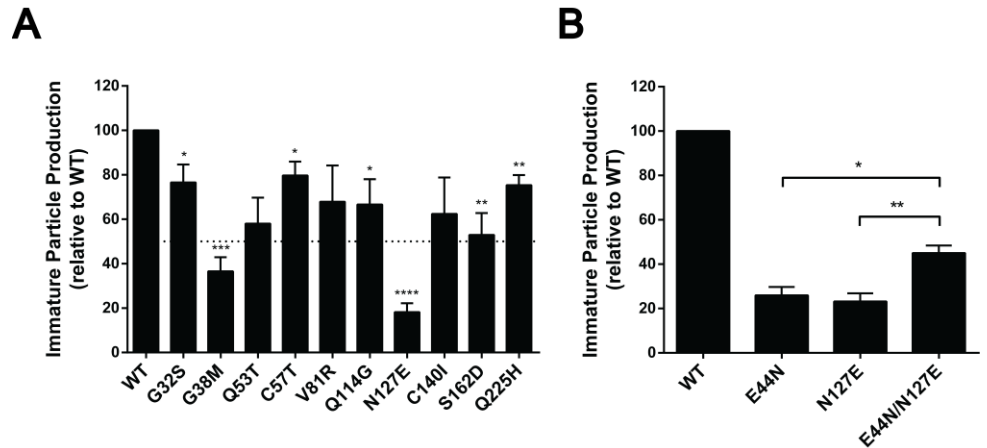

199 **Fig 3. Relative immature particle production for a panel of HIV-2 CA mutants on non-conserved residues.** (A)  
200 Relative immature production of HIV-2 non-conserved residue mutants. (B) Relative immature particle production of  
201 HIV-2 CA E44N, N127E and E44N/N127E. 293T/17 cells were transfected with untagged HIV-2 Gag expression  
202 constructs (WT or mutants), and the cell culture supernatants were harvested 48h post transfection. Immunoblot  
203 analysis was conducted to determine the amount of particle production for WT and mutants. The relative immature  
204 particle production of CA mutants were calculated relative to WT. Histograms are presented to indicate the relative  
205 particle production of HIV-2 CA mutants. Error bars represent standard error of the mean from three independent  
206 experiments. Significance relative to WT was determined by unpaired t test. \*\*\*\*,  $P < 0.0001$ ; \*\*\*,  $P < 0.001$ ; \*\*,  $P <$   
207  $0.01$ ; \*,  $P < 0.05$ .

208

209 In a previous study, E128 residue was mutated to the corresponding HIV-2 residue (HIV-1  
210 E128N) and found to decrease viral replication [36]. HIV-2 N127E immature particle production  
211 is 4.3-fold less than WT (**Fig. 3A**), and mature particle production is 6.7-fold less than WT (**Fig.**  
212 **4C**). HIV-1 E128N mature particle production in our studies is 2.6-fold less than WT.

213 Investigating the position of E128 in the HIV-1 immature CA cryo-EM structure [21] indicates  
214 that E128 is within interaction distance ( $<4 \text{ \AA}$ ) with E45. Based on the HIV-2 sequence, two  
215 single mutations (HIV-2 E44N, N127E) were generated to compare with WT (E44/N127). The  
216 immature particle production of two single mutations, E44N and N127E, was about 4-fold less  
217 than the WT, (**Fig. 3B**). To assess if these two residues positions in HIV-2 are interacting we  
218 performed the double mutation E44N/N127E in the HIV-2 backbone. The immature particle  
219 production showed a ~2-fold increase from either of the single mutants, but was 2-fold less than  
220 WT.

### 221 **Mutations perturb normal Gag subcellular distribution**

222 Gag subcellular distribution is one of the most critical environmental factors contributing to  
223 Gag oligomerization [16]. To investigate the subcellular distribution of HIV-2 mutant Gag  
224 compared to WT, select mutants were analyzed due to significant reduction of immature particle  
225 production. This mutants were L19A at the intra-hexamer interface, A42D at the inter-hexamer  
226 interface, I152A at the CA<sub>NTD</sub>-CA<sub>CTD</sub> linker domain, non-conserved G38M and N127E. Then, the  
227 HIV-2 WT and mutant Gag-YFP constructs were transfected into Hela cells. HIV-2 WT Gag

228 proteins were localized to the plasma membrane as well as in the cytoplasm in a characteristic  
229 punctate distribution pattern, indicative of Gag oligomerization, as described in previous studies  
230 [38]. Among these five mutants, cells transiently transfected with HIV-2 G38M and N127E Gag-  
231 YFP showed a diffuse fluorescence localization in the cytoplasm along with enrichment within or  
232 immediately surrounding the nucleus (**Fig. 5**). These observations suggested that G38M and  
233 N127E perturb the normal subcellular localization of Gag. HIV-2 G38M and N127E are non-  
234 conserved residues in the 3-fold interface and indicated that G38 and N127 play an role in HIV-  
235 2 Gag subcellular distribution.

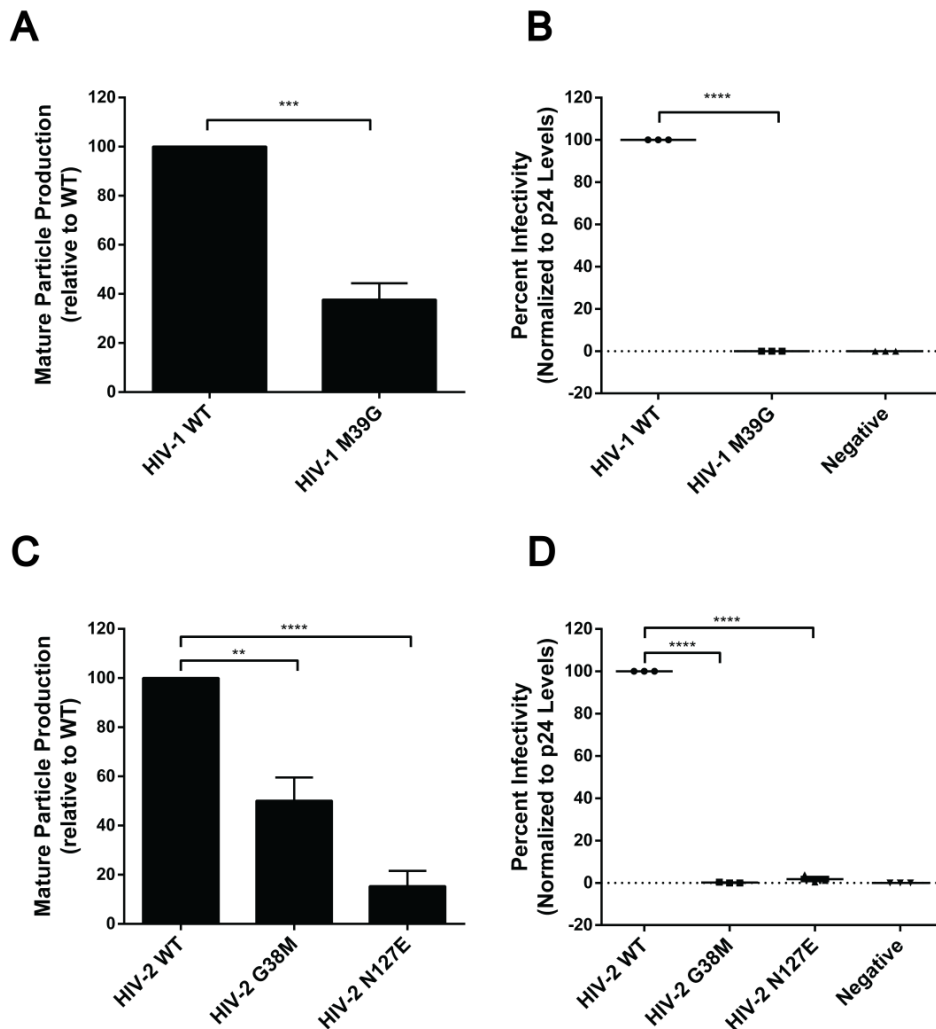

236  
237 **Fig 4. Relative mature particle production and infectivity analysis.** 293T/17 cells were transfected with HIV-1  
238 NL43 MIG (A,B) or HIV-2 ROD MIG (C,D) constructs (WT or mutants) and VSVG, and the mature particles were  
239 harvested from the cell culture supernatants. (A,C) Relative mature particle production. Immunoblot analysis was  
240 conducted to determine the amount of particle production for WT and mutants. HIV CA was evaluated by detection  
241 with an StarBright™ Blue 700 secondary antibody. (B,D) Relative infectivity. MAGI cells were then challenged with  
242 HIV MIG-VSVG viral supernatants or fresh medium (Negative control) and collected 48 h postinfection. Infectivity was  
243 determined by flow cytometry analysis for expression of GFP and mCherry, which are both encoded by the vectors.  
244 Relative infectivity was determined and normalized to particle production. Error bars represent standard deviations

245 from three independent experiments. Significance relative to WT was determined by unpaired t test. \*\*\*\*,  $P < 0.0001$ ;  
246 \*\*\*,  $P < 0.001$ ; \*\*,  $P < 0.01$ .

247

248

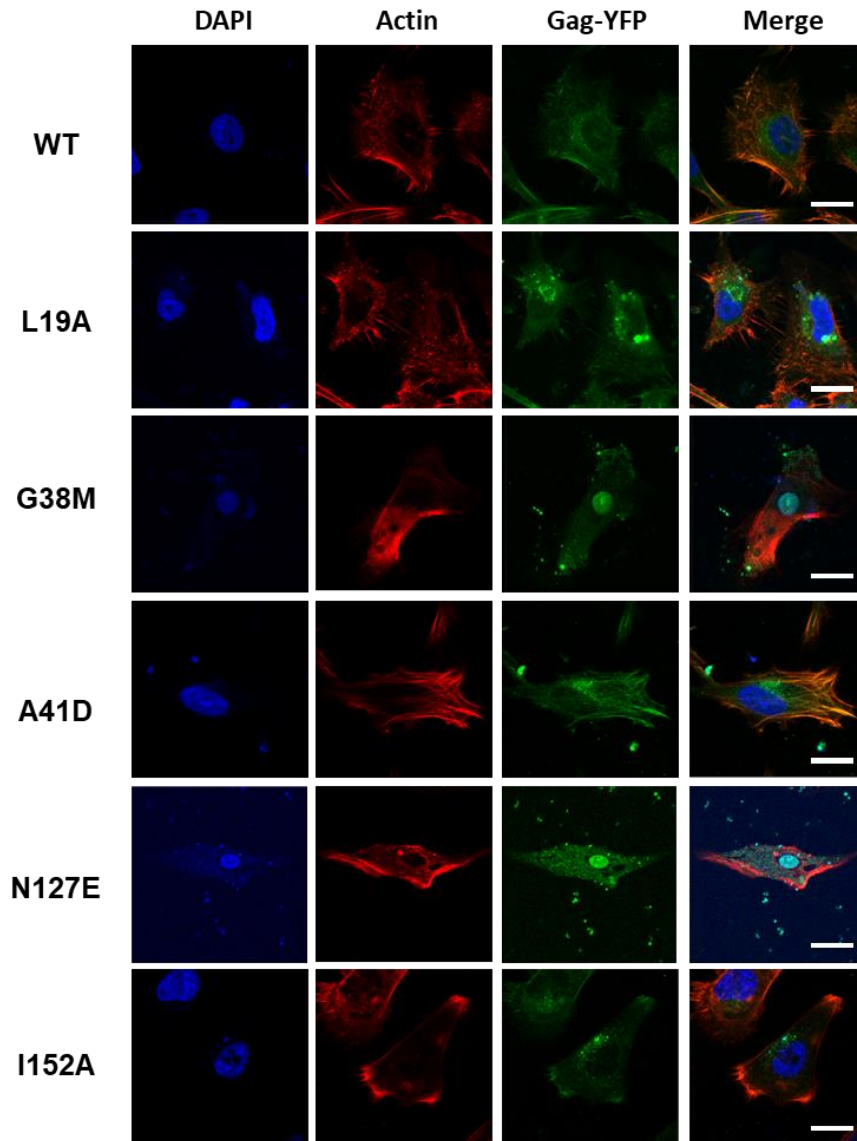

249

250 **Fig 5. Subcellular distribution of HIV-2 Gag for CA mutants.** HeLa cells were transfected with a WT HIV-2 Gag-  
251 eYFP or the indicated mutant Gag. Representative images for WT HIV-2 Gag-eYFP and for the mutants L19A, G38M,  
252 A41D, N127E and I152A are shown. At least 15 individual cells were imaged across three independent replicates for  
253 a total of 15 cells. Scale bar, 20  $\mu\text{m}$

254

### 255 **G38M and N127E disrupt HIV-2 immature particle morphology**

256

257 Generally, the knowledge of critical residues of HIV-2 CA that dictate particle morphology is  
258 limited as compared to other retroviral genera. However, previous studies have discovered  
259 surprising and intriguing differences between the immature Gag lattice structure of HIV-1 and  
other retroviruses [26-28, 37]. Preliminary data in our lab also discovered striking morphological

260 differences between immature WT HIV-1 and HIV-2 particles that argue in support of a model in  
261 which relatively minor changes (such as site-directed mutagenesis) in the geometry of protein-  
262 protein interactions can have a profound impact on overall particle morphology [38].

263 Two key mutants, G38M and N127E, which significantly reduced the immature and mature  
264 particle production, and had a unique Gag subcellular distribution phenotypes, were selected  
265 and the immature particle morphology was examined. HIV-2 WT immature particles had a  
266 uniform particle morphology similar to the previous observations [38] (**Fig. 6A**). In particular,  
267 HIV-2 WT immature particles had a very organized CA lattice beneath the viral membrane. This  
268 organized density suggested a tightly packed immature Gag lattice closely following the inner  
269 viral membrane. The majority of the HIV-2 WT immature particles were discovered to be  
270 spherical, with small portion of the population showing other morphologies (**Fig. 6A**). However,  
271 approximately 25% of HIV-2 G38M (**Fig. 6B**) and N127E (**Fig. 6C**) immature particles have non-  
272 spherical morphologies, such as droplet, angular, and peanut shapes. Unlikely WT, most G38M  
273 and N127E immature particles did not show a organized CA lattice beneath the lipid bilayer,  
274 suggesting incomplete or disorganized Gag lattices in the particles. These observations  
275 suggested that the G38M and N127E mutants possess a defect in the ability of Gag to  
276 oligomerize and form a defined lattice structure, which is a requisite step for infectious particle  
277 formation.

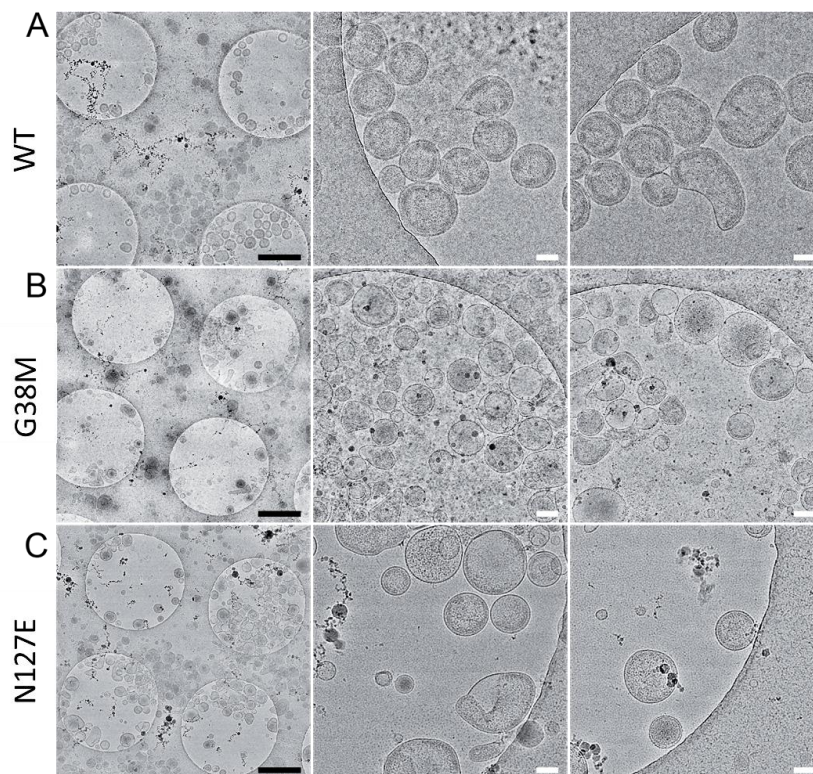



279 **Fig 6. Cryo-EM images of VLPs produced by selected CA mutants.** 293T/17 cells were transfected with untagged  
280 HIV-2 Gag expression constructs (WT or selected mutants), and the immature particles were concentrated and  
281 purified from cell culture supernatants prior to cryo-EM analysis. Shown are representative images of CA mutants  
282 with two magnifications. At least 200 particles were imaged per mutant. Black scale bars, 1  $\mu$ m; white scale bars, 100  
283 nm.

### 284 **G38M and N127E significantly decrease HIV-2 particle infectivity**

286 Infectivity assays of CA point mutants provided robust evidence that a single amino acid  
287 change might disrupt Gag-Gag interactions that impact the HIV life cycle. A single-cycle  
288 infectivity system with a fluorescent reporter system was used as previously described [42]. HIV  
289 pseudoviruses were collected and MAGI cells were challenged with WT or select CA mutant  
290 harboring virions. After 48 hours, the MAGI cells were collected and examined via flow  
291 cytometry. Relative infectivity was determined and normalized to mature particle production  
292 levels by Gag detection in viral supernatants.

293 HIV-2 G38M and N127E were selected for the infectivity assay and exhibited a remarkably  
294 decreased viral infectivity compared to WT, which infectivity was reduced more than 100-fold  
295 and 56-fold less than WT, respectively (**Fig. 4D**). To assess if the equivalent mutations in HIV-1  
296 (see **Fig. 1A**) have similar impacts on particle infectivity, the site-direct mutant HIV-1 CA M39G  
297 mutant exhibited single-cycle infectivity rates xxx fold reduced from WT and HIV-1 CA N128E  
298 from a previous HIV-1 study reported 50-fold less than WT [36].

### 299 **Mutations disrupt HIV-2 CA-NC assembly *in vitro***

300 *In vitro* protein assembly is commonly used for analyzing Gag-Gag interactions as it's an  
301 efficient system to specifically perturb CA interactions and separate it from other cellular effects  
302 [43]. To assess the effects of select HIV-2 CA mutations on CA-CA interactions an HIV-2 CA-  
303 NC protein construct was purified from *E. coli* to conduct *in vitro* assembly assays (see  
304 methods). The purified proteins were dialyzed against assembly buffer conditions that induce  
305 helical assemblies to form with WT HIV-2 CA-NC protein and then quantified by measuring the  
306 reaction turbidity at A340 nm. We used a previously established model that the turbidity of the  
307 solution reflected the status of protein assembly [44, 45]. The assemblies for WT and five HIV-2  
308 CA mutants (L19A, G38M, A41D, N127E, and I152A) were monitored with turbidity  
309 measurements every 20 minutes for 2 hours and corrected for any changes in reaction volume  
310 due to dialysis (**Fig. 7**). Due to the significant reduction of immature particles, L19A at the intra-  
311 hexamer interface (**Fig. 7B**), A42D at the inter-hexamer interface (**Fig. 7D**), I152A at the CA<sub>NTD</sub>-  
312 CA<sub>CTD</sub> linker domain (**Fig. 7F**), non-conserved G38M (**Fig. 7C**) and N127E (**Fig. 7E**) were  
313 chosen for HIV-2 CA-NC assembly assay.

314 The normalized 340 nm value of HIV-2 WT (**Fig. 7A**) peaked at 20 min at 1.27, then slowly  
 315 decreased and remained stable at 0.56. HIV-2 L19A (**Fig. 7B**), G38M (**Fig. 7C**), and I152A (**Fig.**  
 316 **7F**) had similar trends with WT (**Fig. 7A**), but with normalized A340 nm values 1.77, 0.34, and  
 317 0.65, respectively. N127E reached a peak at 40 min, with an A340 nm value of 0.36 (**Fig. 7E**).  
 318 A41D showed low turbidity readings during the experimental time course, of which A340 nm  
 319 value was always less than 0.03 (**Fig. 7D**). G38M, A41D, N127E and I152A showed decreased  
 320 assembly kinetics compared to WT.

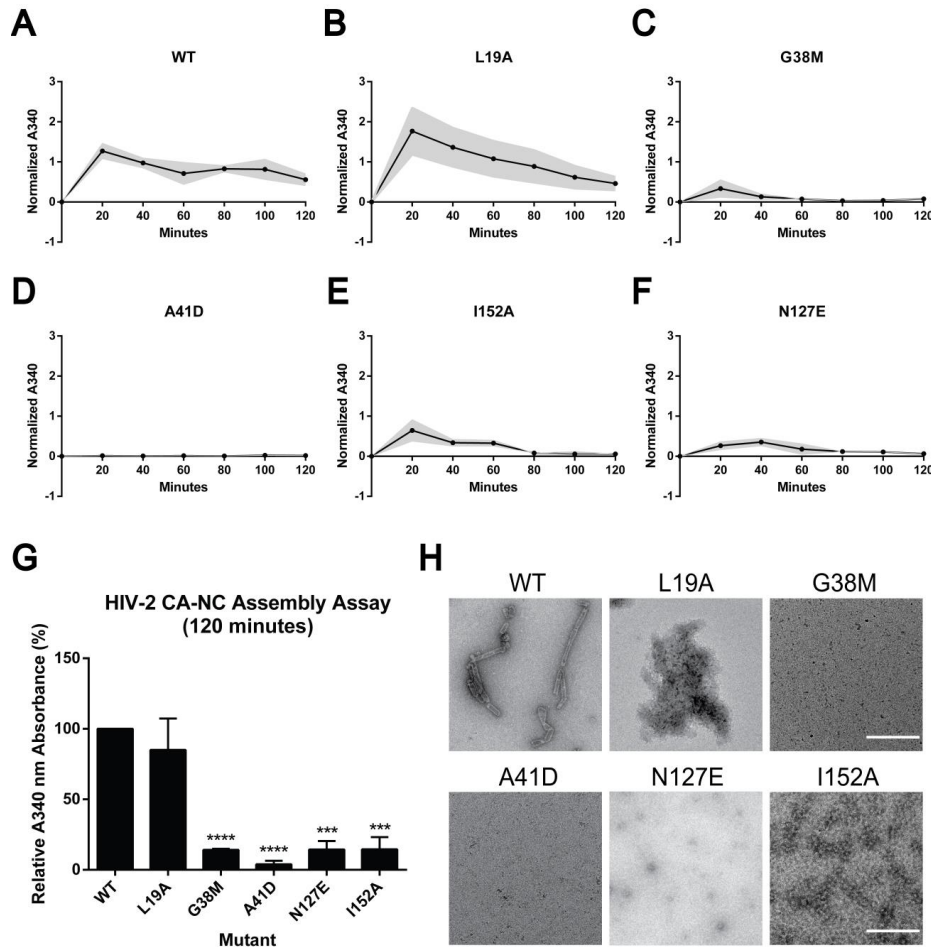

321  
 322 **Fig 7. *In vitro* HIV-2 CA-NC assembly analysis.** (A-F) Assembly kinetics of HIV-2 WT and selected mutants were  
 323 monitored by measuring light scattering at 340 nm while dialyzing the reaction from sizing buffer into the assembly  
 324 buffer at the indicated times. Readings were taken every 20 minutes for 2 hours and corrected for any changes in  
 325 reaction volume due to dialysis. The grey area represents average  $\pm$  standard error of the mean from three  
 326 independent experiments. (G) Relative A340 nm absorbance of selected HIV-2 CA mutants to WT, sampled at 120  
 327 minutes. Error bars represent standard error of the mean from three independent experiments. Significance relative  
 328 to WT was determined by unpaired t test. \*\*\*\*,  $P < 0.0001$ ; \*\*\*,  $P < 0.001$ . (H) Negative staining EM images of  
 329 assembly products, sampled at 120 minutes. Scale bar, 500 nm.

330  
 331 At the final endpoint (120 minutes), G38M, A41D, N127E, and I152A showed significant  
 332 reductions of relative A340 nm values compared to WT, which were 7.0-fold, 25.6-fold, 6.9-fold,

333 6.9-fold less than WT, respectively (**Fig. 7G**). These observations indicated that these mutants  
334 form unstable assembly products that disrupted the CA-NC helical assembly. However, L19A  
335 did not show a significant reduction in relative A340. These observations indicated that mutants,  
336 except L19A, had assembly defects. These residues play critical roles in *in vitro* protein  
337 assembly. Similar to HIV-2 A42D having 25.6-fold less than WT, HIV-1 A42D CA-NC protein  
338 assembly was impaired, and assembled CA-NC particles were 20-fold less than WT [43].

339 Then the assembly products were visualized by negative stain TEM. HIV-2 WT CA-NC  
340 assembled into stable, regularly ordered uniform tubular structures, while G38M, A41D, N127E,  
341 and I152A did not show protein assemble products (**Fig. 7H**). L19A CA-NC showed protein  
342 aggregations without uniform tubular structures formed, suggesting that the observed turbidity  
343 signal was due to large protein aggregates versus ordered helical tubes. These results indicate  
344 all selected mutants had defects in CA-CA interactions that prevented helical tube formation *in*  
345 *vitro*.

346



## 347 Discussion

348 Particle morphologies among retroviral genera are quite distinct, with intriguing differences  
349 observed relative to HIV-1. Intriguingly, HIV-2 produces immature particles distinct from HIV-1 –  
350 *i.e.*, they possess a nearly complete immature Gag lattice, have a larger than average particle  
351 diameter, and have a higher average copy number of incorporated Gag. However, to our  
352 knowledge, this is the first time a panel of HIV-2 mutagenesis was created to analyze HIV-2  
353 Gag-Gag interactions.

354 The two primary goals of our experiments were: (i) to investigate the critical role of the HIV-2  
355 CA for Gag-Gag interactions and virus particle assembly; (ii) to identify the difference between  
356 HIV-1 and HIV-2 CA that alter particle assembly properties. In the study, we created two panels  
357 of site-directed mutants to achieve these goals (**Fig. 1**). One panel of 21 alanine-scanning site-  
358 directed mutants in HIV-2 CA conserved residues, and another panel of 10 mutants at non-  
359 conserved residues by swapping the native HIV-2 residues to the residues from HIV-1 CA.

360 We interrogated key residues in HIV-2 CA, and these mutants are located on CA intra-  
361 hexamer interface, inter-hexamer interface, and linker domain. The specific residues were  
362 chosen for mutagenesis based on structural comparisons between HIV-1 and HIV-2 CA, and  
363 previous publications in HIV-1 [29, 35, 36, 43, 46]. To indicate a disruption of productive Gag-  
364 Gag interactions with the select mutant we set a criteria of a two-fold decrease in particle  
365 production for further investigation. The majority of mutants had no overall effect on immature  
366 particle production, seven conserved mutants (L19A, A41D, I152A, K153A, K157A, N194A,  
367 D196A) and two non-conserved mutants (G38M, N127E) were found to impact Gag-Gag  
368 interactions based on our selection criteria (**Fig. 2 and Fig. 3**).

369 For the mutants in conserved residues, the mutants at the HIV-2 CA<sub>NTD</sub>-CA<sub>CTD</sub> linker domain  
370 did not significantly reduce immature particle production unless they were at the MHR domain  
371 (**Fig. 2A**). Mutants at the intra-hexamer interface reduced particle production (**Fig. 2B**).  
372 Additionally, mutants in the 3-fold interface but not the 2-fold interface significantly reduced  
373 particle production (**Fig. 2C**). These observations indicated that the residues at the intra-  
374 hexamer interface and 3-fold inter-hexamer interface are critical for immature particle production  
375 and CA-CA interactions. Some key residues, such as L19, I152 and N194, were not identified in  
376 HIV studies.

377 We discovered two key mutants (G38M and N127E) in non-conserved residues, which  
378 showed intriguing observations. The key features of the HIV-2 CA G38M and N127E were a  
379 significant reduction of immature particle production (**Fig. 3**) and a significant reduction of  
380 mature particle production. This indicates that these mutations are inhibiting aspects of particle

381 assembly, budding, or release. Additionally, these mutants showed a complete loss of infectivity  
382 with normalized levels of particles were presented to MAGI cells (**Fig. 4**). Gag subcellular  
383 distribution showed a more nuclear and perinuclear localization of Gag for the G38M and  
384 N127E mutants as compared to WT Gag (**Fig. 5**). Direct visualization of the produced immature  
385 particles showed an absence of electron density below the lipid bilayer of immature particles  
386 (**Fig. 6**). In another analysis looking directly at the ability of CA to form oligomers it was  
387 observed that these two mutants significantly disrupt HIV-2 CA-NC protein assembly *in vitro*  
388 with no ordered assemblies present (**Fig. 7**). To probe the structural basis of these results we  
389 looked at molecular interfaces in HIV-1 lattice structures from immature and mature particles.  
390 For HIV-1 it appeared that N128 was in close proximity to E44 at the Using this structural  
391 comparison we chose to mutate E44, the equivalent HIV-2 residue that app with the N127  
392 based on HIV CA structure, and found that two single mutations result in significant particle  
393 reduction, but the double mutation had a partial rescue that suggests these residues may be  
394 involved in a direct interaction in the immature Gag lattice. This indicated an undiscovered  
395 interaction in HIV-2 between E44 and N127 that has not previously observed in HIV-1, which  
396 played an essential role in Gag-Gag interactions.

397 Our results indicated that relatively minor changes such as one residue change could  
398 profoundly impact overall particles. Non-conserved residues such as G38 and N127 might play  
399 an important role in HIV-2 CA structure and Gag-Gag interactions. Intriguingly, G38 and N127  
400 are critical residues in the HIV-2 CA 3-fold inter-hexamer interface, and this suggested that the  
401 3-fold interface is likely to play a critical role in Gag-Gag interactions.

402 However, a potential limitation of our analysis is that not all residues in HIV-2 CA were  
403 mutated and examined. We tried to choose residues with different critical parameters, (i) at a  
404 different location: inter-domain linker, intra-hexamer interface, and inter-hexamer interface (2-  
405 fold interface & 3-fold interface); (ii) conserved and non-conserved residues; (iii) residues at  
406 helix and loop; (iv) previously reported and not reported. Furthermore, future studies such as  
407 analyzing multi-cycle infectivity, reversion mutations in replication-competent virus, and  
408 screening for second site revertants will likely provide other surprising observations that  
409 enhance our understanding of the molecular interactions involved in virus assembly.

410 Taken together, the observations complemented structural analyses of HIV-2 particles and  
411 Gag lattice organization, providing insights into the morphological differences between HIV-1  
412 and HIV-2 immature particles and their impact on virus replication. Our studies emphasized the  
413 differences between HIV-1 and HIV-2 regarding particle assembly and the importance of CA  
414 interactions for retroviral assembly.

## 415 **MATERIALS AND METHODS**

### 416 **Plasmids, cell lines, and reagents**

417 HIV-2 Gag genes in the *pN3-Gag* and *pEYFP-N3-Gag* vectors and HIV-2 Env expression  
418 plasmid have been previously described [38]. HeLa and HEK293T/17 cells lines were  
419 purchased from ATCC (Manassas, VA) and cultured in Dulbecco's modified Eagle medium  
420 (DMEM) supplemented with 10% fetal clone III (FC3; GE Healthcare Lifesciences, UT) and 1%  
421 Penicillin-Streptomycin (Pen Strep; Invitrogen, CA) at 37 °C in 5% CO<sub>2</sub>. *pNL4-3 MIG* [47] and  
422 *pROD-MIG* [48] have been previously described. Viruses were pseudotyped with the VSV-G  
423 expression construct, *pHCMV-G* (San Diego, CA). U373-MAGI-CXCR4<sub>CEM</sub> cells (NIH AIDS  
424 Reagent Program, NIAID, NIH) were maintained similarly to HEK293T/17 cells but with 1.0  
425 µg/mL puromycin, 0.1 mg/mL hygromycin B, and 0.2 mg/mL neomycin to the medium. All cells  
426 used in this study were certified mycoplasma free.

### 427 **Site-directed mutagenesis of gag plasmids**

428 A panel of 21 alanine-scanning HIV-2 CA mutants was engineered by mutating the HIV-2  
429 *pN3-Gag* plasmid (except A42D) to alanine-encoding codons using the Gibson assembly  
430 method as previously described [49]. A panel of 10 non-conserved HIV-2 mutants was  
431 generated by changing the codons in HIV-2 to HIV-1 NL4-3 residues, based on HIV-2 *pN3-Gag*  
432 vectors. The mutants of interest were also engineered into the *pEYFP-N3-Gag*, *pROD-MIG*, and  
433 *pET28a* plasmid backbones for cellular localization, infectivity, and in vitro assembly assays  
434 respectively. All mutants were confirmed by Sanger sequencing. See **Fig. 1A** for mutation sites.

### 435 **Immature particle production**

436 The efficiency of immature particle production was analyzed by quantifying the Gag proteins  
437 in culture supernatants using immunoblot with mouse monoclonal anti-HIV-1 p24 antibody  
438 (Catalogue #: sc-69728; Santa Cruz Biotechnology, TX). Briefly, the *pN3-HIV-2-Gag* plasmid  
439 and the HIV-2 Env expression plasmid were co-transfected into HEK293T/17 cells using GenJet,  
440 ver II (SignaGen, Gaithersburg, MD) at a 10:1 ratio, respectively. After 48-hours post-  
441 transfection, the viral supernatants were harvested, clarified by centrifugation (1,800 × g for 10  
442 min), and filtered through 0.2 µm filters. Then the supernatants were concentrated by  
443 ultracentrifugation in a 50.2 Ti rotor (Beckman Coulter, CA) at 211,400 × g for 90 min through  
444 an 8% Opti-prep (Sigma-Aldrich, MO) cushion. The VLPs were resuspended in 1× STE buffer  
445 (100 mM NaCl, 10 mM Tris pH 8.0, and 1 mM EDTA) (G-Biosciences, MO). The 293T/17 cells  
446 were collected and lysed with the RIPA lysis buffer and clarified via centrifugation (1800 × g for  
447 10 min). The protein concentrations were measured using the BCA assay (Peirce, WI) before  
448 the samples were subjected to SDS-PAGE and transferred to nitrocellulose membranes. Gag

449 proteins were detected with a 1:5,000 dilution of anti-HIV p24 antibody in 2.5% milk TBST (tris  
450 buffer saline plus tween-20). Glyceraldehyde 3-phosphate dehydrogenase (GAPDH) was  
451 detected with 1:1,000 anti-GAPDH hFAB™ Rhodamine antibody (Bio-rad, CA) in 2.5% milk  
452 TBST (tris buffer saline plus tween-20). Membranes were washed before incubation with goat  
453 anti-mouse StarBright™ Blue 700 secondary. Gag levels from cells will be normalized relative to  
454 GAPDH levels, and the mutant Gag expression levels were determined relative to WT.

455 The efficiency of mature particle production was analyzed by quantifying the CA (p24) band  
456 in culture supernatants using the same antibodies as the immature particle production analysis.  
457 Briefly, the HIV-2 *pROD-MIG* plasmids and the VSV-G expression construct were co-  
458 transfected into HEK293T/17 cells using GenJet ver II at a 3:1 ratio to produce WT and mutant  
459 infectious viral particles. After 48-hours post-transfection, the viral supernatants were harvested,  
460 clarified by centrifugation (1,800 × g for 10 min), and filtered through 0.2 µm filters. Then the  
461 supernatants were concentrated by ultracentrifugation in a 50.2 Ti rotor (Beckman Coulter, CA)  
462 at 211,400 × g for 90 min through an 8% Opti-prep (Sigma-Aldrich, MO) cushion. Capsid  
463 proteins were detected with a 1:1,500 anti-HIV p24 antibody. Glyceraldehyde 3-phosphate  
464 dehydrogenase (GAPDH) was detected with 1:1,000 anti-GAPDH hFAB™ Rhodamine antibody  
465 (Bio-rad, CA). CA levels from cells will be normalized relative to GAPDH levels, and the mutant  
466 CA expression levels were determined relative to WT. Membranes were washed before  
467 incubation with 1:3, 000 goat anti-mouse StarBright™ Blue 700 (Bio-Rad, CA).

468 For all blot analysis, membranes were imaged with a ChemiDoc Touch system (Bio-Rad, CA)  
469 and analyzed with ImageJ. Quantified results were presented using GraphPad Prism 6.0  
470 (GraphPad Software, Inc., CA). Significance relative to WT was determined by an unpaired t-  
471 test. Immunoblots were performed with three independent replicates.

#### 472 **Gag subcellular distribution analysis**

473 Gag subcellular distribution was analyzed by quantifying the degree of Gag protein  
474 assembly into puncta using confocal laser scanning microscopy techniques. Subcellular  
475 localization of Gag-eYFP was evaluated as previously described [50]. Briefly, HeLa cells were  
476 cultured in six-well plates on no. 1.5 standard glass coverslips coated with poly-l-lysine, and  
477 experiments were performed as previously described [50]. HeLa cells were transiently  
478 transfected with eYFP-tagged Gag and untagged Gag expression plasmids at a 1:4 ratio using  
479 GenJet, ver II (SignaGen, Gaithersburg, MD). After 48-hours post-transfection, cells were  
480 stained with DAPI (Thermo Fisher Scientific, MA) and ActinRed 555 (Invitrogen, CA) before  
481 fixation with 4% paraformaldehyde (Thermo Fisher Scientific, MA). Cells were imaged via a  
482 Zeiss LSM 700 confocal laser scanning microscope using a Plan-Apochromat 63×/1.40-

483 numeric-aperture (NA) oil objective at 1.2x zoom (Carl Zeiss, Oberkochen, Germany). At least 5  
484 individual cells were imaged across three independent replicates for a total of 15 cells, and WT  
485 Gag-eYFP served as a positive control for WT levels of Gag puncta formation.

#### 486 **Cryo-EM analysis of particle morphology.**

487 The *pN3-HIV-2-Gag* plasmid and the HIV-2 Env expression plasmids were co-transfected  
488 into HEK293T/17 cells using GenJet, ver II (SignaGen, Gaithersburg, MD) at a 10:1 ratio as  
489 previously described [38]. After 48-hours post-transfection, the viral supernatants were  
490 harvested and centrifuged at 1,800 × g for 5 min and followed by passing through a 0.2 µm filter.  
491 VLPs were then concentrated from the supernatants by ultracentrifugation in a 50.2 Ti rotor  
492 (Beckman Coulter, CA) at 211,400 × g for 90 min through an 8% Opti-prep (Sigma-Aldrich, MO)  
493 cushion. The VLP pellets were resuspended in ~200 µl STE buffer before centrifuging over a 10%  
494 to 30% Opti-Prep step gradient at 301,090 x g for 3 hours. The visible viral particle band was  
495 extracted from the gradient and pelleted in STE buffer at 267,636 × g for 1 h using an SW55 Ti  
496 rotor. The pellet was then resuspended in ~10 µl STE buffer and frozen at -80°C. These  
497 samples were analyzed by cryo-EM. The experiments were independently repeated three times.  
498 The particle samples were firstly screened by negative staining TEM with 0.75 % (w/v) uranyl  
499 formate for determining viral particle concentration on a 120 kV Tecnai Spirit TEM [51].

500 HIV-2 Gag WT and mutant VLP samples were prepared for cryo-EM as previously described  
501 [38, 50, 52]. Briefly, the VLP samples were thawed on ice, and approximately 3.5 µL of purified  
502 HIV-2 Gag VLPs were applied to freshly glow-discharged (10 mA for 30 sec using a Leica  
503 Ace600 glow-discharger) Quantifoil R2/1 300-mesh holey carbon-coated copper grids. The grids  
504 were then blotted for 4-10 sec with filter paper at 19°C with 85% relative humidity and plunge-  
505 frozen in liquid ethane using a FEI Mark III Vitrobot or Leica GP-2 grid plunger. The frozen grids  
506 were stored in liquid nitrogen until imaging analysis.

507 The frozen grids were imaged for cryo-EM analysis on a Tecnai FEI G2 F30 FEG  
508 transmission electron microscope (FEI, OR) at liquid nitrogen temperature operating at 300 kV.  
509 Images were recorded at a nominal magnification of 39,000x and 59,000x magnification under  
510 ~25 electrons/Å<sup>2</sup> conditions at 1 to 5 µm under-focus using a Gatan Slow Scan 4k by 4k  
511 charge-coupled-device (CCD) camera or a Gatan K2 Summit direct electron detector (Gatan  
512 Inc., Pleasanton, CA).

#### 513 **Infectivity assay**

514 The HIV-2 *pROD-MIG* plasmids and the VSV-G expression construct were co-transfected  
515 into HEK293T/17 cells using GenJet, ver II (SignaGen, Gaithersburg, MD) at a 3:1 ratio to  
516 produce WT and mutant infectious viral particles. After 48-hours post-transfection, the viral



517 supernatants were harvested, clarified by centrifugation (1,800 × g for 10 min), and filtered  
518 through 0.2 µm filters. U373-MAGI-CXCR4 cells were plated in a 12-well plate and each well  
519 treated with 1 ml viral supernatants and 1 ml fresh medium. Each group had 4 well replicates.  
520 The cells were collected for fluorescence analysis via BD LSR II flow cytometer (BD  
521 Biosciences) 48-hours post-infection as described before [42]. Flow cytometry data were  
522 examined in FlowJo v.7 (Ashland, OR). The infectious cells were calculated from the flow data  
523 by adding all positive quadrants (mCherry+ only, GFP+ only, and mCherry+/GFP+) to determine  
524 infectivity. Mutant infection level was determined related to WT. Then, the relative infectivity of  
525 each group was normalized to its relative mature particle production as assessed by p24  
526 immunoblot of the produced particles. Three independent experiments were performed.

### 527 ***In vitro* HIV-2 CA-NC assembly analysis**

528 HIV-2 CA-NC (Gag amino acids 136-431) was cloned into a pET28a backbone vector, and  
529 capsid mutants were engineered using Gibson assembly reactions. The proteins were purified  
530 following a previously described protocol for purifying nucleocapsid domain-containing HIV-1  
531 Gag proteins [44, 45]. Briefly, the CA-NC protein was expressed in BL21 (DE3) RIP pLysS *E.*  
532 *coli* cells grown in 1L of ZY-auto induction media for 16 hours shaking at 37C [53]. Cells were  
533 resuspended in 50 mL lysis buffer per 1 L culture (500 mM NaCl, 25 mM Tris pH 7.5, 1 µM  
534 ZnCl<sub>2</sub>, 10 mM β-Mercaptoethanol (BME)) and flash frozen. After thawing, cells were lysed by  
535 adding 10 mg lysozyme, 0.1% triton (v/v), and sonicated with 10 sec on/off cycles at 40%  
536 amplitude for three 10 min treatments to reduce viscosity. The supernatant was clarified with a  
537 12,000 × g 40 min spin. Nucleic acids were removed using polyethyleneimine (PEI), and the  
538 protein was precipitated with saturated ammonium sulfate using 1/3 (v/v) of the total  
539 supernatant volume. The precipitated protein was pelleted using a 10,000 × g spin for 15 min.  
540 The precipitate was resuspended in 50 mM NaCl, 25 mM Tris, 5 µM ZnCl<sub>2</sub>, 10 mM BME, pH 7.5,  
541 and further dialyzed against 1L for 1 hour at 4C. The protein was concentrated using Amicon  
542 ultra-15 centrifugal filter unit concentrator (Millipore) and loaded onto an ion-exchange column  
543 (HiTrap SP FF, Cytiva, Global Life Sciences Solutions USA LLC, MA). The protein was eluted  
544 using a linear NaCl gradient from 50-700 mM. Fractions containing the protein were pooled,  
545 concentrated to ~10 mg/mL, and flash frozen in liquid nitrogen.

546 For the assembly assay, the purified protein was diluted to 50 µM in 250 mM NaCl, 50 mM  
547 Tris, pH 8. A 50-mer oligonucleotide consisting of 25 (GT) repeats were added at a final  
548 concentration of 5 µM. The protein was dialyzed against assembly buffer (2M NaCl, 50 mM Tris,  
549 150 µM IP6, 5 µM ZnCl<sub>2</sub>, pH 8) at room temperature in Pierce™ Slide A Lyzer® Mini Dialysis  
550 Units. Turbidity measurements at A340 nm were used to quantify the reaction progress via

551 NanoDrop 1000 Spectrophotometer (Thermo Fisher Scientific, MA). Readings were taken every  
552 20 minutes for 2 hours and corrected for any changes in reaction volume due to dialysis.

553 After 2-hour dialysis, 3  $\mu$ l of each reaction were spotted on EMS CF300-CU grids (Ted Pella,  
554 CA) for 2 minutes. The sample was blotted with filter paper, washed 3x in deionized water,  
555 blotted, and stained in 0.75% (w/v) uranyl formate for 2 minutes. Samples were imaged on an  
556 FEI Technai Spirit Bio-Twin transmission electron microscope at 120 kV.

557



- 558 1. Del Rio, C., *The global HIV epidemic: What the pathologist needs to know*. Semin Diagn Pathol,  
559 2017. **34**(4): p. 314-317.
- 560 2. Campbell-Yesufu, O.T. and R.T. Gandhi, *Update on human immunodeficiency virus (HIV)-2*  
561 *infection*. Clin Infect Dis, 2011. **52**(6): p. 780-7.
- 562 3. Nyamweya, S., et al., *Comparing HIV-1 and HIV-2 infection: Lessons for viral*  
563 *immunopathogenesis*. Rev Med Virol, 2013. **23**(4): p. 221-40.
- 564 4. Andersson, S., et al., *Plasma Viral Load in HIV-1 and HIV-2 Singly and Dually Infected Individuals*  
565 *in Guinea-Bissau, West Africa*. Arch Intern Med, 2000. **160**(21): p. 3286-3293.
- 566 5. de Silva, T.I., M. Cotten, and S.L. Rowland-Jones, *HIV-2: the forgotten AIDS virus*. Trends  
567 Microbiol, 2008. **16**(12): p. 588-95.
- 568 6. van der Loeff, M.F., et al., *Undetectable plasma viral load predicts normal survival in HIV-2-*  
569 *infected people in a West African village*. Retrovirology, 2010. **7**: p. 46.
- 570 7. Spearman, P., *HIV-1 Gag as an Antiviral Target: Development of Assembly and Maturation*  
571 *Inhibitors*. Curr Top Med Chem, 2016. **16**(10): p. 1154-1166.
- 572 8. Freed, E.O., *HIV-1 assembly, release and maturation*. Nat Rev Microbiol, 2015. **13**(8): p. 484-96.
- 573 9. Briant, L., et al., *HIV-1 Assembly, Release and Maturation*. World Journal of AIDS, 2011. **01**(04): p.  
574 111-130.
- 575 10. Sundquist, W.I. and H.G. Krausslich, *HIV-1 assembly, budding, and maturation*. Cold Spring Harb  
576 Perspect Med, 2012. **2**(7): p. a006924.
- 577 11. Gheysen, D., et al., *Assembly and Release of HIV-1 Precursor Pr5Wg Virus-like Particles from*  
578 *Recombinant Baculovirus-Infected Insect Cells*. Cell, 1989. **59**: p. 103-112.
- 579 12. Chen, B., *HIV Capsid Assembly, Mechanism, and Structure*. Biochemistry, 2016. **55**(18): p. 2539-  
580 52.
- 581 13. Molina, J.M., et al., *Efficacy and safety of long-acting subcutaneous lenacapavir in phase 2/3 in*  
582 *heavily treatment-experienced people with HIV: week 26 results (Capella study)*. Journal of the  
583 International AIDS Society, 2021. **24**: p. 75+.
- 584 14. Gottlieb, G.S., et al., *Emergence of multiclass drug-resistance in HIV-2 in antiretroviral-treated*  
585 *individuals in Senegal: implications for HIV-2 treatment in resource-limited West Africa*. Clin Infect  
586 Dis, 2009. **48**(4): p. 476-83.
- 587 15. Smith, R.A., et al., *Antiretroviral drug resistance in HIV-2: three amino acid changes are sufficient*  
588 *for classwide nucleoside analogue resistance*. J Infect Dis, 2009. **199**(9): p. 1323-6.
- 589 16. Maldonado, J.O., et al., *New insights into retroviral Gag-Gag and Gag-membrane interactions*.  
590 Front Microbiol, 2014. **5**: p. 302.
- 591 17. Chukkapalli, V., et al., *Interaction between the human immunodeficiency virus type 1 Gag matrix*  
592 *domain and phosphatidylinositol-(4,5)-bisphosphate is essential for efficient gag membrane*  
593 *binding*. J Virol, 2008. **82**(5): p. 2405-17.
- 594 18. Kafaie, J., et al., *Mapping of nucleocapsid residues important for HIV-1 genomic RNA*  
595 *dimerization and packaging*. Virology, 2008. **375**(2): p. 592-610.
- 596 19. Grime, J.M.A., et al., *Coarse-grained simulation reveals key features of HIV-1 capsid self-*  
597 *assembly*. Nat Commun, 2016. **7**: p. 11568.
- 598 20. Briggs, J.A. and H.G. Krausslich, *The molecular architecture of HIV*. J Mol Biol, 2011. **410**(4): p.  
599 491-500.
- 600 21. Schur, F.K., et al., *Structure of the immature HIV-1 capsid in intact virus particles at 8.8 Å*  
601 *resolution*. Nature, 2015. **517**(7535): p. 505-8.
- 602 22. Zhao, G., et al., *Mature HIV-1 capsid structure by cryo-electron microscopy and all-atom*  
603 *molecular dynamics*. Nature, 2013. **497**(7451): p. 643-6.
- 604 23. Gres, A.T., et al., *X-ray crystal structures of native HIV-1 capsid protein reveal conformational*  
605 *variability*. Science, 2015. **349**(6243): p. 99-103.

- 606 24. Pornillos, O., et al., *X-ray structures of the hexameric building block of the HIV capsid*. Cell, 2009.  
607 **137**(7): p. 1282-92.
- 608 25. Pornillos, O., B.K. Ganser-Pornillos, and M. Yeager, *Atomic-level modelling of the HIV capsid*.  
609 Nature, 2011. **469**(7330): p. 424-7.
- 610 26. Briggs, J.A., et al., *Cryo-electron microscopy reveals conserved and divergent features of gag*  
611 *packing in immature particles of Rous sarcoma virus and human immunodeficiency virus*. J Mol  
612 Biol, 2006. **355**(1): p. 157-68.
- 613 27. Qu, K., et al., *Structure and architecture of immature and mature murine leukemia virus capsids*.  
614 Proc Natl Acad Sci U S A, 2018. **115**(50): p. E11751-E11760.
- 615 28. Briggs, J.A., et al., *Structure and assembly of immature HIV*. Proc Natl Acad Sci U S A, 2009.  
616 **106**(27): p. 11090–11095.
- 617 29. von Schwedler, U.K., et al., *Functional surfaces of the human immunodeficiency virus type 1*  
618 *capsid protein*. J Virol, 2003. **77**(9): p. 5439-50.
- 619 30. Meng, X., et al., *Protease cleavage leads to formation of mature trimer interface in HIV-1 capsid*.  
620 PLoS Pathog, 2012. **8**(8): p. e1002886.
- 621 31. Srinivasakumar, N., M.L. Hammarskjöld, and D. Rekosh, *Characterization of deletion mutations*  
622 *in the capsid region of human immunodeficiency virus type 1 that affect particle formation and*  
623 *Gag-Pol precursor incorporation*. J Virol, 1995. **69**(10): p. 6106-6114.
- 624 32. Doi, N., et al., *Role for Gag-CA Interdomain Linker in Primate Lentiviral Replication*. Front  
625 Microbiol, 2019. **10**: p. 1831.
- 626 33. Strambio-de-Castillia, C. and E. Hunter, *Mutational analysis of the major homology region of*  
627 *Mason-Pfizer Monkey Virus by use of saturation mutagenesis*. J Virol, 1992. **66**(12): p. 7021-7032.
- 628 34. Craven, R.C., et al., *Genetic analysis of the major homology region of the Rous Sarcoma Virus*  
629 *Gag protein*. J Virol, 1995. **69**(7): p. 4213-4227.
- 630 35. Ganser-Pornillos, B.K., et al., *Assembly properties of the human immunodeficiency virus type 1*  
631 *CA protein*. J Virol, 2004. **78**(5): p. 2545-52.
- 632 36. Shoko Nakanishi, S.W., Naoya Doi, Takaaki Koma, Akio Adachi, Masako Nomaguchi, *Virological*  
633 *characterization of HIV-1 CA-NTD mutants constructed in a virus-lineage reflected manner*. The  
634 Journal of Medical Investigation, 2018. **65**(1.2): p. 110-115.
- 635 37. Zhang, W., et al., *Morphology and ultrastructure of retrovirus particles*. AIMS Biophys, 2015. **2**(3):  
636 p. 343-369.
- 637 38. Martin, J.L., et al., *Distinct Particle Morphologies Revealed through Comparative Parallel*  
638 *Analyses of Retrovirus-Like Particles*. J Virol, 2016. **90**(18): p. 8074-84.
- 639 39. Miyazaki, Y., et al., *Comparison of Biochemical Properties of HIV-1 and HIV-2 Capsid Proteins*.  
640 Front Microbiol, 2017. **8**: p. 1082.
- 641 40. Tanaka, M., et al., *Mutations of Conserved Residues in the Major Homology Region Arrest*  
642 *Assembling HIV-1 Gag as a Membrane-Targeted Intermediate Containing Genomic RNA and*  
643 *Cellular Proteins*. J Virol, 2016. **90**(4): p. 1944-63.
- 644 41. Donna L. Mallery, A.B.K., Nadine Renner, K. M. Rifat Faysal, Mariia Novikova, Leo Kiss, Miranda S.  
645 C. Wilson, Bilal Ahsan, Zunlong Ke, John A. G. Briggs, Adolfo Saiardi, Till Böcking, Eric O. Freed,  
646 and Leo C. James, *A stable immature lattice packages IP6 for HIV capsid maturation*. Sci Adv,  
647 2021. **7**(11): p. eabe4716.
- 648 42. Rawson, J.M., C.L. Clouser, and L.M. Mansky, *Rapid Determination of HIV-1 Mutant Frequencies*  
649 *and Mutation Spectra Using an mCherry/EGFP Dual-Reporter Viral Vector*. Methods Mol Biol,  
650 2016. **1354**: p. 71-88.
- 651 43. Dostalkova, A., et al., *A simple, high-throughput stabilization assay to test HIV-1 uncoating*  
652 *inhibitors*. Sci Rep, 2019. **9**(1): p. 17076.

- 653 44. Kucharska, I., et al., *Biochemical Reconstitution of HIV-1 Assembly and Maturation*. J Virol, 2020.  
654 **94**(5).
- 655 45. Barbie K. Ganser, S.L., Victor Y. Klishko, John T. Finch, Wesley I. Sundquist, *Assembly and*  
656 *Analysis of Conical Models for the HIV-1 Core*. Science, 1999. **283**(5398): p. 80-83.
- 657 46. Jiang, J., et al., *The interdomain linker region of HIV-1 capsid protein is a critical determinant of*  
658 *proper core assembly and stability*. Virology, 2011. **421**(2): p. 253-65.
- 659 47. Clouser, C.L., S.E. Patterson, and L.M. Mansky, *Exploiting drug repositioning for discovery of a*  
660 *novel HIV combination therapy*. J Virol, 2010. **84**(18): p. 9301-9.
- 661 48. Beach, L.B., et al., *Novel inhibitors of human immunodeficiency virus type 2 infectivity*. J Gen  
662 Virol, 2014. **95**(Pt 12): p. 2778-83.
- 663 49. Heydenreich, F.M., et al., *High-throughput mutagenesis using a two-fragment PCR approach*. Sci  
664 Rep, 2017. **7**(1): p. 6787.
- 665 50. Martin, J.L., et al., *Critical Role of the Human T-Cell Leukemia Virus Type 1 Capsid N-Terminal*  
666 *Domain for Gag-Gag Interactions and Virus Particle Assembly*. J Virol, 2018. **92**(14).
- 667 51. Thompson, R.F., et al., *An introduction to sample preparation and imaging by cryo-electron*  
668 *microscopy for structural biology*. Methods, 2016. **100**: p. 3-15.
- 669 52. Martin, J.L., et al., *Disparate Contributions of Human Retrovirus Capsid Subdomains to Gag-Gag*  
670 *Oligomerization, Virus Morphology, and Particle Biogenesis*. J Virol, 2017. **91**(14).
- 671 53. Studier, F.W., *Protein production by auto-induction in high density shaking cultures*. Protein Expr  
672 Purif, 2005. **41**(1): p. 207-34.
- 673 54. Madeira, F., et al., *The EMBL-EBI search and sequence analysis tools APIs in 2019*. Nucleic Acids  
674 Res, 2019. **47**(W1): p. W636-W641.
- 675 55. Price, A.J., et al., *Active site remodeling switches HIV specificity of antiretroviral TRIMCyp*. Nat  
676 Struct Mol Biol, 2009. **16**(10): p. 1036-42.
- 677 56. Buchan, D.W.A. and D.T. Jones, *The PSIPRED Protein Analysis Workbench: 20 years on*. Nucleic  
678 Acids Res, 2019. **47**(W1): p. W402-W407.
- 679 57. Jones, D.T., *Protein secondary structure prediction based on position-specific scoring matrices*. J  
680 Mol Biol, 1999. **292**(2): p. 195-202.

681

682 **Figure 1**

683

684

**A**

|              |     | Helix 1             |                 | Helix 2         |                    | Helix 3 |              |                  |        |        |               |              |     |    |     |     |
|--------------|-----|---------------------|-----------------|-----------------|--------------------|---------|--------------|------------------|--------|--------|---------------|--------------|-----|----|-----|-----|
| <b>HIV-1</b> | 1   | PIVQNLQGMVHQAI      | SPRTLNAWVKVVEE  | KAF             | SP                 | EVI     | PMFS         | ALSEGATPQDLNMLNI | VGGH   | 62     |               |              |     |    |     |     |
|              |     | * **:: *            | : .*            | :*****:****     | *                  | **:*    | *.*****.     | ** * * *         | **.*   |        |               |              |     |    |     |     |
| <b>HIV-2</b> | 1   | P-VQHVGGNYTHIPL     | SPRTLNAWVKLVEEK | F               | GA                 | EVV     | PGFQ         | ALSEGC           | TPYDIN | MLNC   | VGD           | H            | 61  |    |     |     |
|              |     |                     |                 |                 |                    |         |              |                  |        |        |               |              |     |    |     |     |
|              |     | Helix 4             |                 | Helix 5         |                    | Helix 6 |              |                  |        |        |               |              |     |    |     |     |
| <b>HIV-1</b> | 63  | QAAMQMLKETINEEAAEWD | RLH             | PVHAGPIAPGQMR   | EP                 | RGSDIA  | GTTS         | TLQEQI           | C      | WMTH   | -N            | 121          |     |    |     |     |
|              |     | *****::*            | *****           | **:             | **:                | **:     | *****:*****: | ***              | **     | :      | :             |              |     |    |     |     |
| <b>HIV-2</b> | 62  | QAAMQIIREIINEEAAEWD | VQ              | HPI-PGPLPAGQLRE | P                  | RGSDIA  | GTTS         | TVEEQI           | C      | WMFR   | PQ            | 120          |     |    |     |     |
|              |     |                     |                 |                 |                    |         |              |                  |        |        |               |              |     |    |     |     |
|              |     | Helix 7             |                 | Helix 8         |                    | Helix 9 |              |                  |        |        |               |              |     |    |     |     |
| <b>HIV-1</b> | 122 | PPI                 | PVGEIYKRWI      | ILGLNK          | I                  | VRMY    | SPTS         | SILDIR           | QGPKE  | PFR    | DYVDRFYKTLRAE | QASQEV       | 181 |    |     |     |
|              |     | *:***:***:***       | :**:*           | ****.*          | *****:             | *****:  | *****:       | *****:           | *****: | *****: | *****:        | *****:       | *   |    |     |     |
| <b>HIV-2</b> | 121 | NPV                 | PVGN            | IYRRWI          | QIGLQK             | C       | VRMY         | NPTNILDIK        | QGPKEP | FQ     | S             | YVDRFYKSLRAE | Q   | TD | PAV | 180 |
|              |     |                     |                 |                 |                    |         |              |                  |        |        |               |              |     |    |     |     |
|              |     | Helix 9             | Helix 10        | Helix 11        | Helix 12           |         |              |                  |        |        |               |              |     |    |     |     |
| <b>HIV-1</b> | 182 | KNWMTET             | LLVQN           | AN              | PDCKTILKA          | LGPGA   | TLEEMMTACQ   | GVG              | PG     | G      | KARVL         | 231          |     |    |     |     |
|              |     | *****:*****:*****   | **.*            | *               | *****:*****:*****: | *****:  | *****:       | *****:           | *****: | *****: | *****:        |              |     |    |     |     |
| <b>HIV-2</b> | 181 | KNWMTQT             | LLVQN           | AN              | PDCKLVLKG          | LG      | MNPT         | LEEMLTAC         | QGVGG  | PG     | KARLM         | 230          |     |    |     |     |
|              |     |                     |                 |                 |                    |         |              |                  |        |        |               |              |     |    |     |     |

685

686

**B**

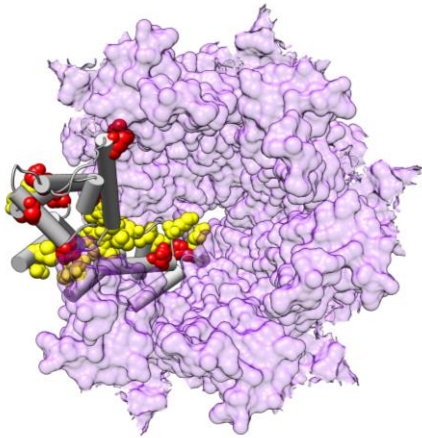

**C**

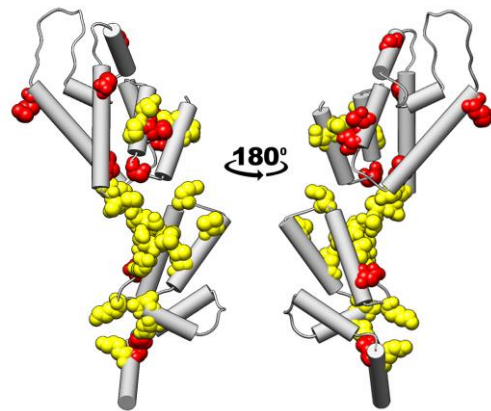

687

688

689 **Figure 1. (A) Alignment of HIV-1 and HIV-2 CA sequences.** Amino acid sequences in CA of  
690 HIV-1 NL4-3 (GenBank accession no. AF324493; CA 1-231; Gag 133-363) and HIV-2 ROD  
691 (GenBank accession no. M15390; CA 1- 230; Gag 136-365) were aligned by Clustal Omega  
692 Multiple Sequence Alignment [54]. Locations of HIV-1 immature CA helices in this alignment are  
693 as described previously [21] (PDB ID: 5L93) and indicated by black boxes. HIV-2 immature  
694 CA<sub>NTD</sub> (CA 1-144; Gag 136-279) helices are as described previously [55] (PDB ID: 2WLV), and  
695 indicated with blue boxes. CA<sub>CTD</sub> (CA 145-230; Gag 280-365) helices are predicted by the  
696 PSIPRED server [56, 57], indicated by green boxes. “\*” indicates conserved amino acids; “:”  
697 indicates amino acid substitution with high amino acid similarity; “.” indicates amino acid  
698 substitutions with low similarity. Yellow highlight indicates alanine-scanning mutagenesis on  
699 conserved residues. Red highlight indicates mutagenesis on non-conserved residues, which  
700 HIV-2 residues were mutated to HIV-1 types. **(B) Structure of CA hexamer.** Mutagenesis of  
701 conserved residues were colored yellow, and mutagenesis of non-conserved residues were  
702 colored red. **(C) Structure of CA monomer.**  
703  
704

705 **Figure 2**

706

707

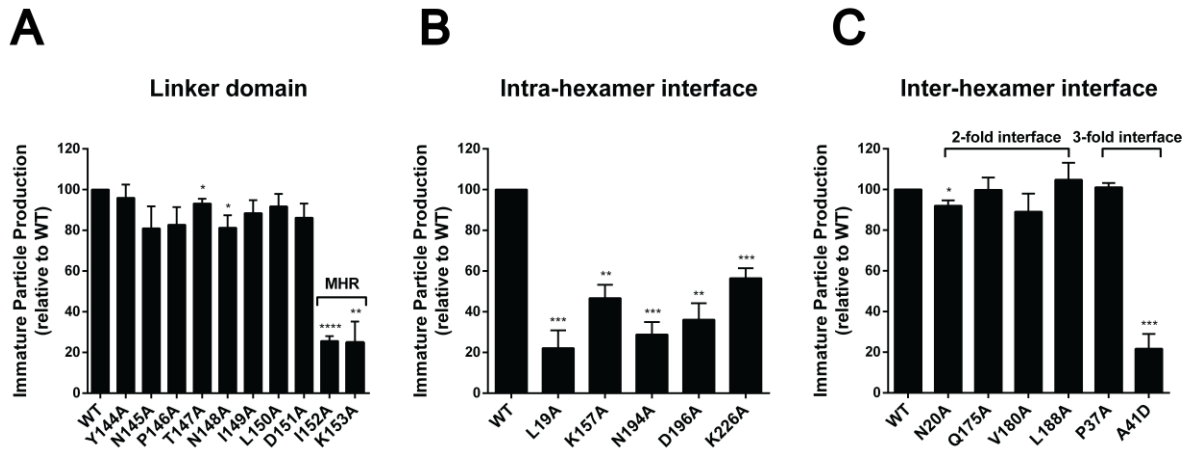

708

709

710 **Figure 2. Relative immature particle production of HIV-2 CA mutants at CA<sub>NTD</sub>-CA<sub>CTD</sub>**  
711 **linker (A), intra-hexamer interface (B), and inter-hexamer interface (C).** 293T/17 cells were  
712 transfected with untagged HIV-2 Gag expression constructs (WT or alanine-scanning mutants),  
713 and the cell culture supernatants were harvested 48h post transfection. Immunoblot analysis  
714 was conducted to determine the amount of immature particle production for WT and CA  
715 conserved mutants. The relative particle production of CA mutants was calculated relative to  
716 WT. Histograms are presented to indicate the relative immature particle production of HIV-2 CA  
717 alanine-scanning mutants. Error bars represent standard error of the mean from three  
718 independent experiments. Significance relative to WT was determined by unpaired t test. \*\*\*\*,  $P$   
719  $< 0.0001$ ; \*\*\*,  $P < 0.001$ ; \*\*,  $P < 0.01$ ; \*,  $P < 0.05$ . MHR = Major homology region.

720

721



722 **Figure 3**

723

724

**A**

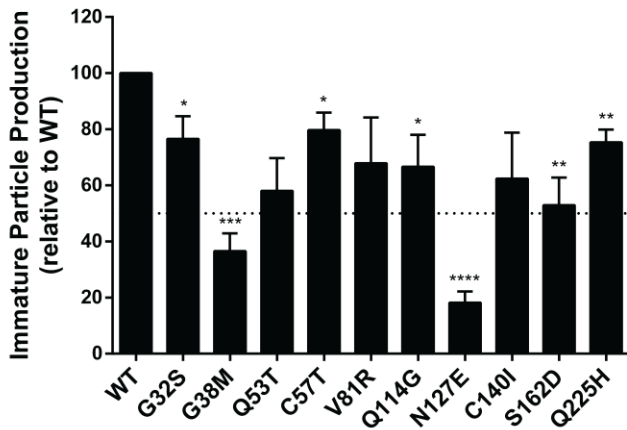

**B**

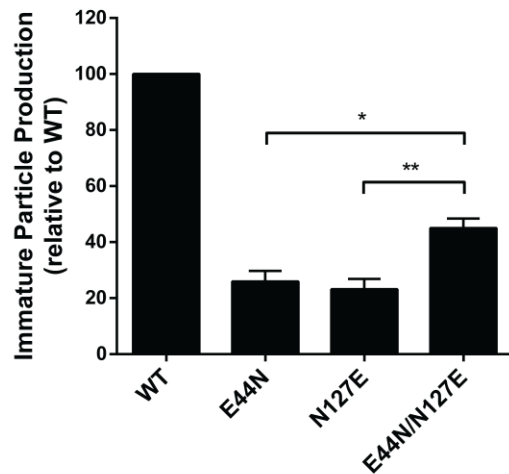

725

726

727 **Figure 3. Relative immature particle production for a panel of HIV-2 CA mutants on non-**

728 **conserved residues.** (A) Relative immature production of HIV-2 non-conserved residue

729 mutants. (B) Relative immature particle production of HIV-2 CA E44N, N127E and E44N/N127E.

730 293T/17 cells were transfected with untagged HIV-2 Gag expression constructs (WT or

731 mutants), and the cell culture supernatants were harvested 48h post transfection. Immunoblot

732 analysis was conducted to determine the amount of particle production for WT and mutants.

733 The relative immature particle production of CA mutants were calculated relative to WT.

734 Histograms are presented to indicate the relative particle production of HIV-2 CA mutants. Error

735 bars represent standard error of the mean from three independent experiments. Significance

736 relative to WT was determined by unpaired t test. \*\*\*\*,  $P < 0.0001$ ; \*\*\*,  $P < 0.001$ ; \*\*,  $P < 0.01$ ; \*,

737  $P < 0.05$ .

737



738 **Figure 4**

**A**

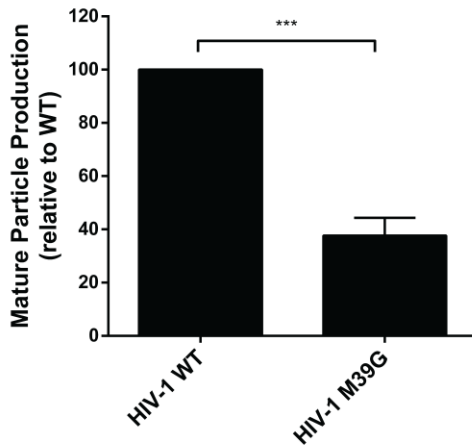

**B**

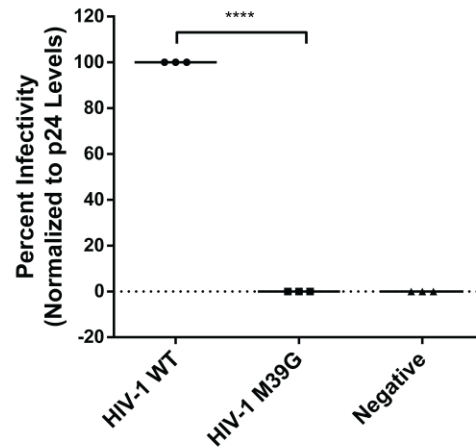

**C**

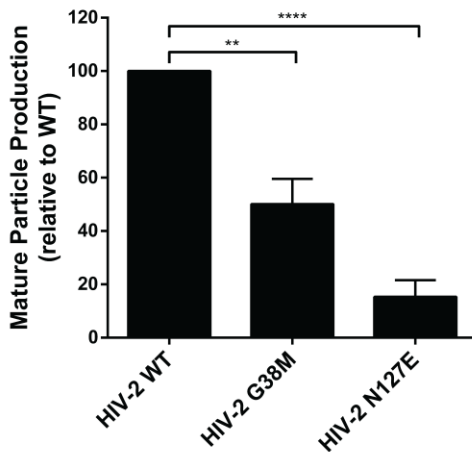

**D**

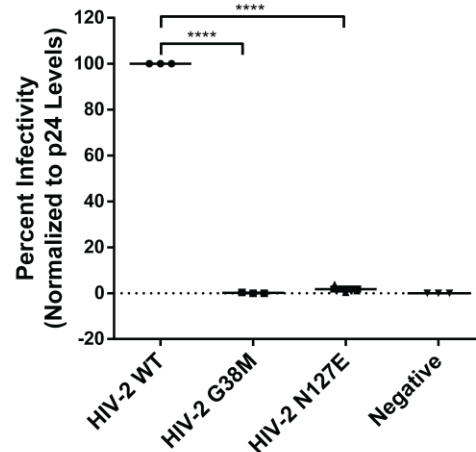

739

740

741

742

743

744

745

746

747

748

749

750

751

752

**Figure 4. Relative mature particle production and infectivity analysis.** 293T/17 cells were transfected with HIV-1 NL43 MIG (A,B) or HIV-2 ROD MIG (C,D) constructs (WT or mutants) and VSVG, and the mature particles were harvested from the cell culture supernatants. (A,C) Relative mature particle production. Immunoblot analysis was conducted to determine the amount of particle production for WT and mutants. HIV CA was evaluated by detection with an StarBright™ Blue 700 secondary antibody. (B,D) Relative infectivity. MAGI cells were then challenged with HIV MIG-VSVG viral supernatants or fresh medium (Negative control) and collected 48 h postinfection. Infectivity was determined by flow cytometry analysis for expression of GFP and mCherry, which are both encoded by the vectors. Relative infectivity was determined and normalized to particle production. Error bars represent standard deviations from three independent experiments. Significance relative to WT was determined by unpaired t test. \*\*\*\*,  $P < 0.0001$ ; \*\*\*,  $P < 0.001$ ; \*\*,  $P < 0.01$ .

753 **Figure 5**

754

755

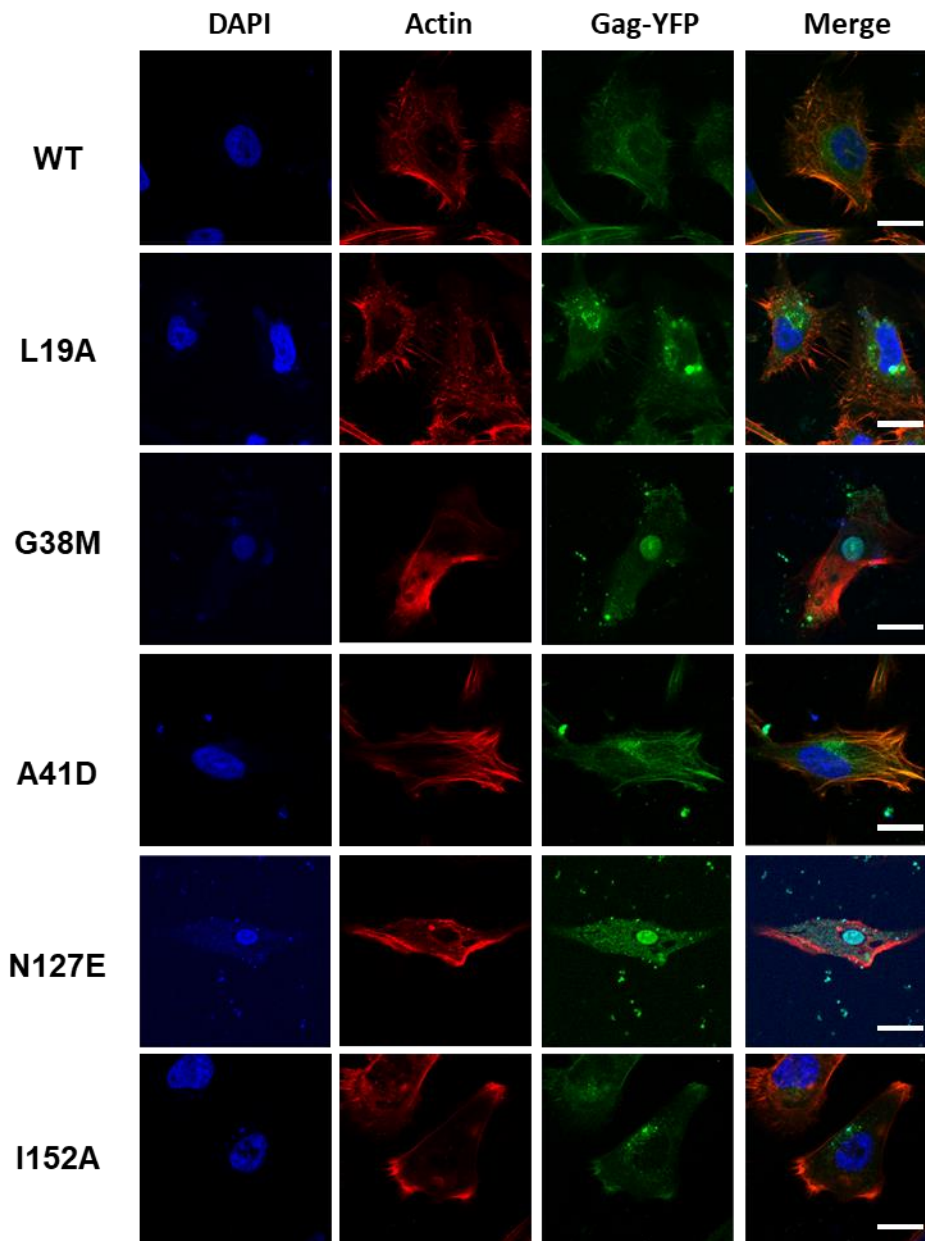

756

757

758 **Figure 5. Subcellular distribution of HIV-2 Gag for CA mutants.** HeLa cells were  
759 transfected with a WT HIV-2 Gag-eYFP or the indicated mutant Gag. Representative images for  
760 WT HIV-2 Gag-eYFP and for the mutants L19A, G38M, A41D, N127E and I152A are shown. At  
761 least 15 individual cells were imaged across three independent replicates for a total of 15  
762 cells. Scale bar, 20  $\mu$ m.

763

764

765 **Figure 6**  
766

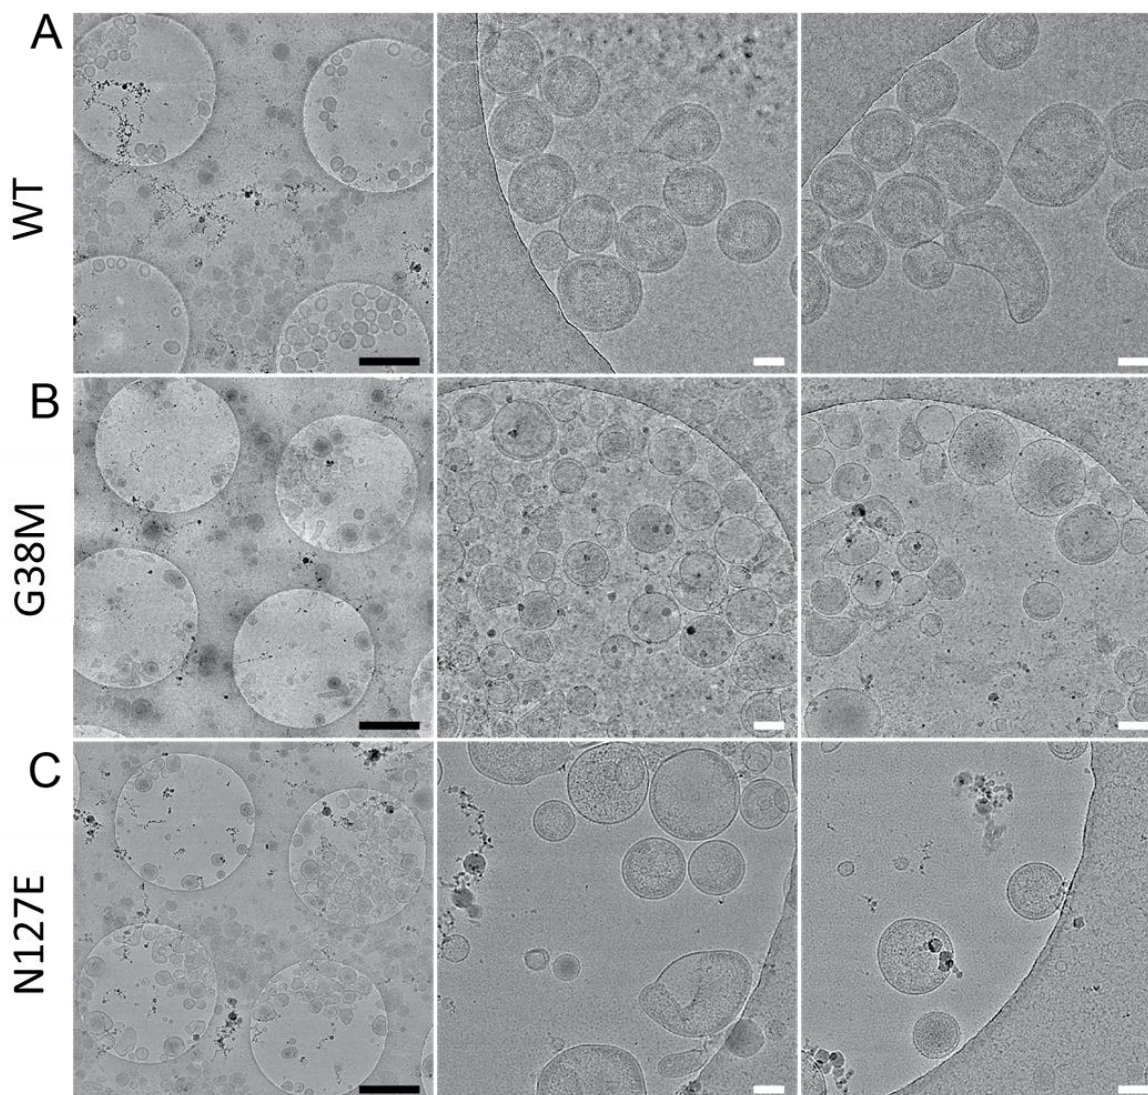

767  
768  
769 **Figure 6. Cryo-EM images of VLPs produced by selected CA mutants.** 293T/17 cells were  
770 transfected with untagged HIV-2 Gag expression constructs (WT or selected mutants), and the  
771 immature particles were concentrated and purified from cell culture supernatants prior to cryo-  
772 EM analysis. Shown are representative images of CA mutants with two magnifications. At least  
773 200 particles were imaged per mutant. Black scale bars, 1 μm; white scale bars, 100 nm.  
774  
775

776

## Figure 7

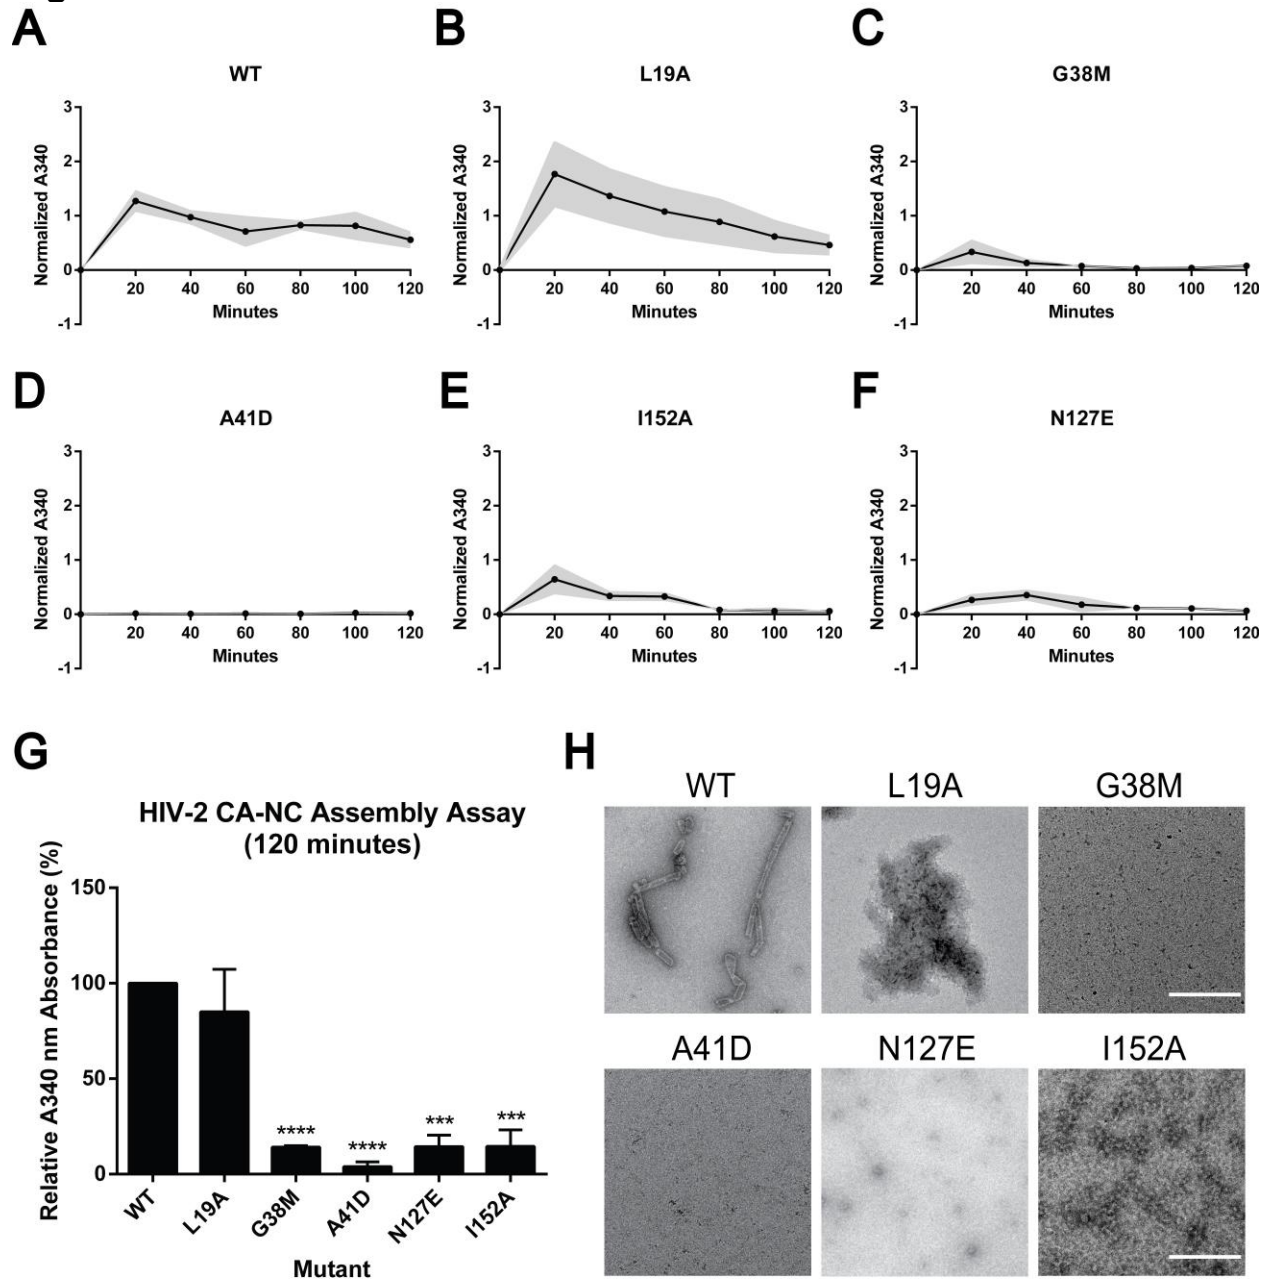

777

778

779 **Figure 7. *In vitro* HIV-2 CA-NC assembly analysis.** (A-F) Assembly kinetics of HIV-2 WT and

780 selected mutants were monitored by measuring light scattering at 340 nm while dialyzing the

781 reaction from sizing buffer into the assembly buffer at the indicated times. Readings were taken

782 every 20 minutes for 2 hours and corrected for any changes in reaction volume due to dialysis.

783 The grey area represents average  $\pm$  standard error of the mean from three independent

784 experiments. (G) Relative A340 nm absorbance of selected HIV-2 CA mutants to WT, sampled

785 at 120 minutes. Error bars represent standard error of the mean from three independent

786 experiments. Significance relative to WT was determined by unpaired t test. \*\*\*\*,  $P < 0.0001$ ; \*\*\*,

787  $P < 0.001$ . (H) Negative staining EM images of assembly products, sampled at 120 minutes.

788 Scale bar, 500 nm.
